# Supplementary material for: Correlations of skin fold thickness and validation of prediction equations using DEXA as the gold standard for estimation of body fat composition in Pakistani children
Source: PubMed Central journal article supplement — BMJ Open. 2014 Apr 22;4(4):e004194. doi: 10.1136/bmjopen-2013-004194 (PMC4010860; doi:10.1136/bmjopen-2013-004194), 2014-04-22
Supplement: bmjopen-2013-004194.draft_revisions.pdf [file bmjopen-2013-004194.draft_revisions.pdf]

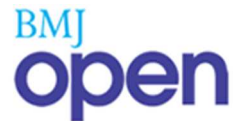

**Correlation of skin folds thickness and validation of prediction equations using DEXA as gold standard for estimation of body fat composition in Pakistani children**

|                                 |                                                                                                                                                                                                                                                                                                                                              |
|---------------------------------|----------------------------------------------------------------------------------------------------------------------------------------------------------------------------------------------------------------------------------------------------------------------------------------------------------------------------------------------|
| Journal:                        | <i>BMJ Open</i>                                                                                                                                                                                                                                                                                                                              |
| Manuscript ID:                  | bmjopen-2013-004194                                                                                                                                                                                                                                                                                                                          |
| Article Type:                   | Research                                                                                                                                                                                                                                                                                                                                     |
| Date Submitted by the Author:   | 08-Oct-2013                                                                                                                                                                                                                                                                                                                                  |
| Complete List of Authors:       | Hussain, Zainab; Aga Khan University Hospital, Radiology<br>Jafar, Tazeen; Aga Khan University Hospital, Community Health Sciences<br>Zaman, Maseeh uz; Aga Khan University Hospital (AKUH), Radiology<br>Parveen, Riffat; Aga Khan University Hospital, Radiology<br>Saeed, Farzan; Aga Khan University Hospital, Community Health Sciences |
| <b>Primary Subject Heading</b>: | Paediatrics                                                                                                                                                                                                                                                                                                                                  |
| Secondary Subject Heading:      | Radiology and imaging, Epidemiology                                                                                                                                                                                                                                                                                                          |
| Keywords:                       | EPIDEMIOLOGY, NUCLEAR MEDICINE, Paediatric orthopaedics < ORTHOPAEDIC & TRAUMA SURGERY, Paediatric radiology < PAEDIATRICS                                                                                                                                                                                                                   |
|                                 |                                                                                                                                                                                                                                                                                                                                              |

SCHOLARONE™  
Manuscripts

1  
2  
3  
4  
5  
6  
7  
8  
9

# Correlation of skin folds thickness and validation of prediction equations using DEXA as gold standard for estimation of body fat composition in Pakistani children

10  
11  
12  
13

Zainab Hussain<sup>1</sup>, Tazeen Jafar<sup>2</sup>, Maseeh uz Zaman<sup>1</sup>, Riffat Parveen<sup>1</sup>, Farzan Saeed<sup>2</sup>

- 14  
15  
16  
17  
18  
19
1. Department of Radiology, The Aga Khan University Hospital (AKUH), Karachi, Pakistan
  2. Department of Community Health Sciences (CHS), The Aga Khan University Hospital (AKUH), Karachi, Pakistan

20  
21  
22  
23  
24

## Corresponding Author

25  
26  
27  
28  
29  
30  
31  
32  
33  
34  
35  
36  
37  
38  
39  
40  
41  
42  
43  
44  
45  
46  
47  
48  
49  
50  
51  
52  
53  
54  
55  
56  
57  
58  
59  
60

Maseeh uz Zaman MD, FASNC, FRCP (Edn)  
MBBS, MS, FCPS, FEBNM (EU), DCBNC (USA)  
Associate Professor and Head Section of Nuclear Medicine,  
Department of Radiology, The Aga Khan University Hospital (AKUH), Karachi, Pakistan.  
[maseeh.uzzaman@aku.edu](mailto:maseeh.uzzaman@aku.edu)

## **ABSTRACT**

**Objective:** to determine the correlation between Dual Energy X-ray Absorptiometry (DEXA) and skinfold thickness equations (SKF) for estimation of body fat composition in secondary school children and validation of prediction equations by Slaughter, Goran and Dezenberg.

**Design:** Cross sectional analytical study.

**Setting:** Joint Commission for International Accredited (JCIA) tertiary care hospital of Karachi, Pakistan from January 2010 till May 2010.

**Participants:** The study was approved by Hospital's ethical review committee. Written and verbal consents were obtained from principals of two schools and parents of 99 children (mean age of  $14 \pm 1.89$  years; min-max 9-19 years; 54 male and 45 female) accrued in study. DEXA scan was acquired and skin fold thickness was measured at angle of the scapula, iliac crest and mid arm for bicep and triceps skin folds using Holtain calipers. Correlations were established between estimated fat mass (FM) and percentage body fat (%BF) calculated by DEXA and those predicted by prediction equations. On obtaining significant correlation of  $>0.5$ , overall accuracy and bias was calculated.

**Results:** There was an overall increased adiposity in females with fat mass of 3.57 kg and %BF 6.2% higher than male counterpart ( $p < 0.05$ ). Slaughter equation predicted %BF accurately with overall high accuracy, minimal bias and with good agreement with DEXA. Dezenberg and Goran equations had significant bias in prediction of fat mass which was statistically significant with low level of accuracy of the Goran equation.

**Conclusion:** We conclude that Slaughter equation for estimating %BF showed strong validation with DEXA and can be used interchangeably in pediatric population. However, for estimation of fat mass, previously formulated equations by Goran and Dezenberg showed significant

1  
2  
3 difference in our population. We do recommend further studies for developing and validation of  
4  
5 skin fold equations specific to Pakistani pediatric population.  
6  
7

8  
9 **STRENGTH AND LIMITATIONS:** This is the first well designed and conducted study from a  
10  
11 JCIA accredited tertiary care Hospital (Aga Khan University Hospital), Karachi Pakistan. In this  
12  
13 study various well known equations for estimation of percentage body fat and fat mass in  
14  
15 Western population have been validated for Pakistani children. Relatively smaller sample size is  
16  
17 the basic limitation of this research output and warrants and provokes local researchers to do  
18  
19 further well design studies in future.  
20  
21

22  
23  
24 **KEY WORDS:** Pediatric Obesity; DEXA; percentage body fat; fat mass; Slaughter; Goran;  
25  
26 Dezenberg; skin fold thickness equations  
27  
28  
29  
30  
31  
32  
33  
34  
35  
36  
37  
38  
39  
40  
41  
42  
43  
44  
45  
46  
47  
48  
49  
50  
51  
52  
53  
54  
55  
56  
57  
58  
59  
60

## INTRODUCTION

Obesity is now being reported as the new world epidemic afflicting more than 1 billion adults globally<sup>1</sup>. According to WHO reports a great number of children (22 million) are afflicted with obesity with a great proportion in the United States, however the developing nations are not to be spared<sup>2</sup>. Analysis of the national health survey in Pakistan for adults reveals that lower BMI thresholds were suggested than those recommended in western population based on their association with outcome of chronic disease<sup>3</sup>. Same situation exists in children. Retrospective analysis of data in Britain revealed that there was an increased risk of obesity in Afro Caribbean and Pakistani girls whereas Indian and Pakistani boys were found to be at higher risk for overweight<sup>4</sup>. In another study it was reported that application of international standards did not provide a reliable result due to significant difference in height at the same ages of children belonging to the Asian and African descent as compared to standard population who showed a greater proportion of central obesity<sup>5</sup>. Based on these results emerged the concept of measuring body fat composition as standardization of BMI as an obesity measurement index across different ethnicities remains to be formulated.

Body fat composition is measured in children using dual energy x-ray absorptiometry (DEXA) as gold standard. Multiple validations of this technique with chemical composition, total body weighting and hydro densitometry have been performed<sup>6-9</sup>. Due to its very small amount of radiation and short procedure time it is ideal for use in children.<sup>10</sup>

However it is not suitable for use in field work as it is not widely available and involves transportation of participants to tertiary care settings. Another method that has been validated and widely used in the west is prediction equations based on anthropometric indices such as skinfold thickness of the biceps, triceps and abdominal wall as well as waist circumference and

1  
2  
3 waist hip ratios (Slaughter<sup>11</sup>, Goran<sup>12</sup> and Dezenberg<sup>13</sup> equations). As availability of DEXA is  
4  
5 limited to larger centers it is imperative to validate skinfold thickness equations for measurement  
6  
7  
8 of obesity in general population.  
9

10  
11 The purpose of this study was to determine the correlation between DEXA and skinfold  
12  
13 thickness equations for estimation of body fat composition in secondary school children and  
14  
15 validation of prediction equations (Slaughter, Goran and Dezenberg equations) against gold  
16  
17 standard of DEXA by determining agreement and accuracy.  
18  
19

## 20 21 22 23 **MATERIAL AND METHODS**

24  
25 This was a cross sectional analytical study conducted in Nuclear Medicine section, Department  
26  
27 of Radiology, The Aga Khan University Hospital (AKUH), Karachi, Pakistan from Jan 2010 to  
28  
29 May 2010-. The study was approved by AKUH ethical review committee.  
30  
31

32  
33 The study population consisted of children enrolled form Class five till matriculate in the  
34  
35 academic year from August of 2009 till May of 2010 form 2 community based schools belonging  
36  
37 to the middle class strata. After the initial approval from the principal and obtaining school  
38  
39 consent, a briefing lecture was delivered to the children with diagrammatic presentation of the  
40  
41 machine and skin fold calipers. Thereafter assent forms to be signed by the children themselves  
42  
43 and consent forms to be signed by the parents were distributed amongst the children.  
44  
45  
46  
47 Furthermore phone numbers were obtained from the school administration and parents called to  
48  
49 further explain the procedures and obtain verbal consent as well. All children whose parents gave  
50  
51 consent were enrolled and those children from whom consent could not be obtained were  
52  
53  
54  
55 excluded.  
56  
57  
58  
59  
60

1  
2  
3 The sampling strategy was convenient sampling where consecutive children were enrolled till  
4 completion of sample size. A sample size of 44 subjects was needed to achieve 90% power to  
5 detect a change in slope from 0.0 under the null hypothesis to 0.45 under the alternative  
6 hypothesis when the standard deviation of the Triceps skin fold is 5.90, the standard deviation of  
7 Fat Mass by DEXA is 5.90, and the two-sided significance level is 0.05. These values were  
8 obtained from a study performed in children aged 4-10 years<sup>14</sup>. However since 2 schools were  
9 included, by considering a design effect of 2, the required sample size was calculated as 88  
10 subjects.  
11  
12  
13  
14  
15  
16  
17  
18  
19  
20  
21

22  
23 Data collection was performed on a designed questionnaire for the study. It included the socio-  
24 demographic data of the subject and all independent variables. Training of the principal  
25 investigator (PI) and the data collector was done according to the National Health & Nutrition  
26 Examination Survey (NHANES) manual<sup>15</sup>. A senior radiologist trained the data collectors for  
27 identification of the anatomical surface landmarks where measurements of the skin fold were to  
28 be obtained namely the angle of the scapula, the iliac crest and the midpoint of the arm for  
29 measuring bicep and triceps skin folds. Intra and inter observer variability was assessed for 10  
30 sets of reading and readings with a discrepancy for more than 0.4 mm were retaken and the  
31 procedure revised. Abdominal and hip circumference was measured using a measuring tape  
32 according to the described technique and a difference of more than one centimeter was  
33 considered unacceptable.  
34  
35  
36  
37  
38  
39  
40  
41  
42  
43  
44  
45  
46  
47  
48  
49

50 DEXA scan was performed on Hologic Discovery-A QDR series, USA. The parameters of the  
51 scan were alternating fan beam radiations of 140 kV and 100 kV with a scan width of 26.4  
52 inches and scan length of maximum 77 inches (195 cm). The participant was asked to change in  
53 a hospital gown and asked to lie straight on the table with hands by the side palms facing down  
54  
55  
56  
57  
58  
59  
60

1  
2  
3 away from the thighs and look at the ceiling to maintain head position. The body was positioned  
4 within the scan parameters marked on the table. The feet were rotated inwards so that the toes  
5 touched each other and taped so that the position was maintained. The method of performing the  
6 analysis of the estimation for %BF and total fat mass was done in the pediatric whole body scan  
7 mode for children up till 12 years of age. For children aged between 12 years onwards the adult  
8 scan mode was used for the calculation of body fat composition parameters. Reliability between  
9 scans was achieved with phantom calibration.

10  
11  
12  
13  
14  
15  
16  
17  
18  
19  
20  
21 The measure of fat mass and %BF calculated by DEXA were received as a printout from the  
22 scanner and values were entered in the study performa. Prediction of the same parameters via  
23 preformed prediction equations (Slaughter's, Goran and Dezenberg) using skinfold thickness and  
24 anthropometric measures were also made.

### 30 31 **Body measurements:**

32  
33  
34 All body measurements were taken in accordance with the protocol described for anthropometric  
35 measurements in the National Health & Nutrition Examination Survey-3<sup>15</sup>. Body measurements  
36 were taken on the right side of the body.

37  
38  
39 Anthropometric measurements were taken using specially designed calipers (Holtain Calipers).  
40  
41  
42 The measurements included weight, triceps skinfold thickness and sub scapular skinfold  
43 thickness.

44  
45  
46  
47  
48  
49  
50 Weight was measured using a Tanita TBF 305 body fat analyser and weighing scales (Tanita UK  
51  
52  
53 Ltd, Yewsley, Middlesex, UK).

54  
55  
56 *Measuring skin fold thickness:*  
57  
58  
59  
60



1  
2  
3 Skinfolds measurements were taken to the nearest 0.1 millimeter. All skinfold measurements  
4  
5 were done in duplicate (i.e., twice by the same investigator) since these measures have the most  
6  
7 variability. Skinfold thickness was measured by Holtain calipers. The procedure was thoroughly  
8  
9 explained to the children and the use of the caliper was demonstrated on the child's palm.  
10  
11

12  
13 Data for all the independent variables was collected by the PI and assisting technician in the  
14  
15 Dexa room. Two readings were taken for height, weight, abdominal and hip circumference,  
16  
17 triceps, and subscapular and suprailiac skin fold thicknesses. If a difference of more than 0.3 mm  
18  
19 was recorded the readings were retaken. Calibration of the calipers was performed periodically  
20  
21 according to the calibration block provided by the manufacturers. The stadiometer and weighing  
22  
23 scale were also calibrated and checked for correct position of zero before each data set recording.  
24  
25  
26  
27

28  
29 **Statistical analysis:** Descriptive statistics were calculated for the data with mean and standard  
30  
31 deviations for all continuous variables. Proportions were described for categorical data such as  
32  
33 gender and independent T-test was applied to assess significant difference among gender.  
34  
35

36  
37 The next step of the analysis was to validate the equation for fat mass and percentage body fat  
38  
39 described by Goran, Dezenberg and Slaughter. In order to do this initially correlations were  
40  
41 established between estimated FM and %BF calculated by DEXA and that predicted by using the  
42  
43 equations. On obtaining significant correlation of  $>0.5$ , overall accuracy and bias was calculated.  
44  
45

46  
47 *Accuracy* was defined as the degree of closeness of predicted fat mass and percent body fat  
48  
49 obtained from the equations to their actual criterion value estimated by DEXA and would be  
50  
51 considered significant if more than 90%. This was done by obtaining the overall mean of fat  
52  
53 mass and %BF by DEXA as well as the Dezenberg, Goran and Slaughter equations. The  
54  
55  
56  
57  
58  
59  
60

1  
2  
3 predicted mean of the equations was then subtracted from the mean value calculated by DEXA.  
4  
5 The difference was then expressed as a percentage of the mean of the prediction equation.  
6  
7

8  
9 **Bias** was defined as the systematic error within the data and was assessed as the average of the  
10  
11 difference between FM and %BF measured by DEXA and that predicted by the equations and  
12  
13 plotting the mean of errors against 0 using one sample t-test.  
14  
15

16  
17 **Agreement** was defined as the degree of resemblance or consistency between the predicted and  
18  
19 estimated values for fat mass and percent body fat. It was evaluated by applying the intra-class  
20  
21 correlation coefficients.  
22  
23

24  
25 Bland Altman plots were also generated for evaluation of agreement and bias. Based on the  
26  
27 above mentioned criteria the equation for %BF by Slaughter and for fat mass by Dezenberg and  
28  
29 Slaughter were rendered valid or rejected. A commercial Statistical Package for Social Sciences  
30  
31 (SPSS Version 7) was used for these measurements.  
32  
33  
34  
35  
36  
37  
38  
39  
40  
41  
42  
43  
44  
45  
46  
47  
48  
49  
50  
51  
52  
53  
54  
55  
56  
57  
58  
59  
60

## RESULTS

### *Descriptive analysis and gender difference:*

Ninety nine (n= 99) subjects were registered with a mean age of  $14 \pm 1.89$  years (min-max 9-19 yrs) with 54 male and 45 female subjects. There was an evidence of overall increase in the adiposity of females as compared to males. All skin fold measures as well as fat composition variables were significantly higher in girls with p-value  $< 0.05$ . After assigning the binary variables it was observed that there was a difference of 3.57 kg fat mass present in excess in females as compared to the males as calculated by DEXA (p-value  $< 0.0001$ ). Significant differences were also obtained for %BF which was 6.2 % more in females as compared to males (p-value  $< 0.05$ ). (Table 1)

After obtaining baseline data, the equations were applied to the sample for prediction of fat mass by Dezenberg and Goran as well as %BF by Slaughter. In the linear regression analysis strong correlations were obtained between the predicted values and the criterion values by DEXA with p-value  $< 0.0001$ . (Table 2)

### *Validation of equations:*

#### *Overall accuracy:*

The overall accuracy for the Slaughter equation was 98.4% which was very high and within the cutoff described previously. Dezenberg equation had an overall accuracy of 90.3% which was just within the cut-off designed. Goran equation showed weak overall accuracy of 83% which did not fall within the cutoff defined.

#### *Calculating Bias:*

1  
2  
3 No significant difference was obtained between the Slaughter equation predicting %BF and that  
4  
5 estimated by DEXA with a bias of 0.37 (p-value 0.8). However, significant differences for  
6  
7 predicting fat mass were obtained between DEXA and Dezenberg. The equation underestimated  
8  
9 the fat mass with a bias of 1.26 kg which was statistically significant (p-value <0.0001). While  
10  
11 Goran equation overestimated the fat mass with a bias of 1.48 kg which was statistically  
12  
13 significant with a p-value of <0.0001. These results were further elaborated by the presentation  
14  
15 of Bland Altman graphs in Figure 1.  
16  
17  
18

19  
20  
21 *Calculating intraclass correlation coefficients to assess internal validity:*  
22

23  
24 Good correlations were identified ranging from 0.82-0.86 with significant p-values of <0.0001.  
25  
26 This is suggestive of strong internal validity between the estimated and predicted values.  
27

28  
29 Thus in view of the above criteria the Slaughter equation fulfilled all the criteria for predicting  
30  
31 %BF accurately as the overall accuracy is high with minimal bias which is not statistically  
32  
33 significant and showing good agreement with %BF measured by DEXA. Furthermore more than  
34  
35 75% of the readings were within 5% of the DEXA values.  
36  
37

38  
39 The Dezenberg and Goran equations had significant bias in prediction of fat mass which was  
40  
41 statistically significant with low level of accuracy of the Goran equation. A summary of the  
42  
43 results is shown in Table 3  
44  
45  
46  
47  
48  
49  
50  
51  
52  
53  
54  
55  
56  
57  
58  
59  
60

## DISCUSSION

The onset of obesity in the pediatric population has shown early precedence of atherosclerotic changes and diabetes mellitus with the onset of metabolic syndrome thus rendering obesity as a major health concern. Thus with this background we set out to conduct a study for the measurement of obesity in our pediatric population. A new technique of predicting body fat composition is by prediction equations (Salughter<sup>11</sup>, Goran<sup>12</sup>, and Dezenberg<sup>13</sup> equations) which have been developed for the western world. We attempted to validate these equations to predict body fat composition in our pediatric population which comprised of fat mass and %BF using DEXA as the gold standard. In this study only the Slaughter equation was validated for predicting %BF with a good correlation and high accuracy (98.4%). No significant bias was seen amongst the predicted and estimated method for measuring %BF with good intra class correlation coefficients ( $R = 0.82$ ). These equations have been validated in different studies and used widely. In a study carried out by Janz in 122 subjects of pre and post pubescent children ranging from 8-17 years very high intra class correlations (0.98-0.99) and high validity correlations of (0.79-0.99) were achieved<sup>16</sup>. In another study conducted in Zaragoza, Spain carried out on 237 adolescents it was found that the Slaughter equations had the narrowest limits of agreement as compared to the other equations and did not show statistically significant bias<sup>17</sup>. Our results have been similar with the equation showing validity across all criteria.

Equations of fat mass by Goran and Dezenberg were not validated and showed significant bias. These results could be explained by the application of coefficients that were derived for the western population. Therefore determining coefficients for the predictors used in the Dezenberg equation and deriving a prediction equation that is sample specific could possibly yield better results. Another reason for inability to validate the Dezenberg equation might be that our sample

1  
2  
3 consisted of both pre and post pubescent children. The application of maturity specific  
4 coefficients by performing the Tanner staging might have different results as these were  
5 conducted on children who were prepubescent. Furthermore data regarding the ethnic origin and  
6 socio demographic status was also not applied. However all children were living in the same  
7 town going to community center schools with a middle class status. The Goran equation also  
8 was established on a cohort of children whose mean age was much lower than that of our sample.  
9  
10 Furthermore gender was not accounted for in the equation we used whereas in our population  
11 significant differences were found between boys and girls for fat mass as well as all skin folds.  
12  
13

14  
15  
16  
17  
18  
19  
20  
21  
22  
23 Very few studies have been done regionally in the South Asian population. In a study conducted  
24 in Sri Lanka in 282 children ages ranging from 5-15 years were tested for predicted %BF using  
25 multiple equations as well as Slaughter equation<sup>18</sup>. Although the bias calculated (-11.6 to 5.8)  
26 was not significant but the limits of agreement were high with significant underestimation of  
27 %BF rendering the equation invalid. An explanation for these results could be the criterion  
28 method that was used which was hydro densitometry. No results have been stated for validation  
29 against DEXA. In our study bias was not significant and more than 75% of the sample lied  
30 between a 5% variation as compared to DEXA. In 2010 a study was conducted in Hong Kong  
31 where children aged 9-19 were recruited and skin fold thickness were validated with subsequent  
32 formation of new equations<sup>19</sup>. However again the criterion used was air displacement  
33 plethysmography with only a subset validation with DEXA. They found significant difference  
34 between %BF estimated by the Slaughter equation although the absolute value was only of  
35 1.52%. This was negated by our study which could be explained by the criterion method as being  
36 different and a significant difference in ethnicity. To the best of our understanding this is the  
37 first study conducted in Pakistani pediatric population to determine the correlation and validation  
38  
39  
40  
41  
42  
43  
44  
45  
46  
47  
48  
49  
50  
51  
52  
53  
54  
55  
56  
57  
58  
59  
60

1  
2  
3 of skinfold thickness equations for estimation of body fat composition using DEXA as gold  
4  
5 standard.  
6  
7  
8  
9

## 10 **CONCLUSIONS**

11  
12  
13 We conclude that the Slaughter equation for estimating %BF showed strong validation with  
14 DEXA and can be used interchangeably in pediatric population. However, for estimation of fat  
15 mass, the previously formulated equations by Goran and Dezenberg showed significant  
16 difference in our population. We do recommend further studies for developing and validation of  
17 skin fold equation specific to Pakistani pediatric population.  
18  
19  
20  
21  
22  
23  
24

## 25 **ACKNOWLEDGMENT**

26  
27  
28 We would like to acknowledge the department of community health sciences for their support in  
29 carrying out the logistics of the study. The authors would also acknowledge the efforts of Dr.  
30 Nadeem Ahmad ex chairperson for his support in the project.  
31  
32  
33  
34  
35  
36  
37  
38  
39

## 40 **CONTRIBUTORSHIP STATEMENT**

41  
42 All authors have substantially contributed to conception and design of study, acquisition of data,  
43 analysis and interpretation of data and preparatio of masnuscripty.  
44  
45  
46  
47

## 48 **CONFLICT OF INTEREST:**

49  
50 This study was funded by the university research council of Aga Khan University hospital and  
51 was part of the thesis requirement for Master's program  
52  
53  
54  
55  
56  
57  
58  
59  
60

## REFERENCES

1. Puska P, Nishida C. Obesity and overweight. World health organization; global strategy on diet, physical activity and health. 2003
2. Young-Hyman D, Schlundt DG, Herman L, et al. Evaluation of the insulin resistance syndrome in 5- to 10-year-old overweight/obese African-American children. *Diabetes Care* 2001;**24**:1359–64.
3. Yusuf S, Hawken S, Ounpuu S, et al. Effect of potentially modifiable risk factors associated with myocardial infarction in 52 countries (the INTERHEART study): case-control study. *Lancet* 2004;**364**:937-52.
4. Strauss R, Pollack H. Epidemic increase in childhood overweight, 1986-1998. *JAMA* 2001;**286**:2845-48.
5. Cole T, Bellizzi M, Flegal K, et al. Establishing a standard definition for child overweight and obesity worldwide: international survey. *BMJ* 2000;**320**:1240
6. Wang ZM, Pierson Jr RN, Heymsfield SB. The five-level model: a new approach to organizing body-composition research. *Am Soc Nutrition* 1992. p. 19-28.
7. Johansson AG, Forslund A, Sjödin A, et al. Determination of body composition - a comparison of dual-energy x-ray absorptiometry and hydrodensitometry. *Am J Clin Nutr* 1993;**57**:323–26.



- 1  
2  
3  
4  
5  
6  
7  
8  
9  
10  
11  
12  
13  
14  
15  
16  
17  
18  
19  
20  
21  
22  
23  
24  
25  
26  
27  
28  
29  
30  
31  
32  
33  
34  
35  
36  
37  
38  
39  
40  
41  
42  
43  
44  
45  
46  
47  
48  
49  
50  
51  
52  
53  
54  
55  
56  
57  
58  
59  
60
8. Pintauro S, Nagy TR, Duthie C, et al. Cross-calibration of fat and lean measurements by dual energy x-ray absorptiometry to pig carcass analysis in the pediatric body weight range. *Am J Clin Nutr* 1996;**63**: 293–99.
9. Wang ZM, Pierson Jr RN, Heymsfield SB. The five-level model: a new approach to organizing body-composition research. *Am Soc Nutrition*; 1992. p. 19-28
10. Ellis J, Shypailo R, Pratt J, Pond W. Accuracy of dual energy x-ray absorptiometry in children for body composition measurements. *Am J Clin Nutr* 1994;**60**:660-65.
11. Slaughter MH, Lohman TG, Boileau RA, et al. Skinfold equations for estimation of body fatness in children and youth. *Human Biology* 1988;**60**:709–23.
12. Goran M, Driscoll P, Johnson R, et al. Cross-calibration of body-composition techniques against dual-energy X-ray absorptiometry in young children. *Am J Clin Nutr* 1996;**63**:299-305.
13. Dezenberg CV, Nagy TR, Gower BA, et al. Predicting body composition from anthropometry in preadolescent children. *Int J Obes* 1999;**23**:253–59.
14. Eisenmann J, Heelan K, Welk G. Assessing body composition among 3- to 8-year-old children: anthropometry, BIA, and DXA. *Obesity Research* 2004;**12**:1633–40.
15. National health and nutrition examination survey III. Body Measurements (Anthropometry). Westat, Inc. 1650 Research Boulevard. Rockville, MD 20850 ...  
[www.cdc.gov/nchs/data/nhanes/nhanes3/cdrom/.../ANTHRO.PDF](http://www.cdc.gov/nchs/data/nhanes/nhanes3/cdrom/.../ANTHRO.PDF)
16. Janz KF, Nielsen DH, Cassady SL, et al. Cross-validation of the Slaughter skinfold equations for children and adolescents. *Medicine & Science in Sports & Exercise* 1993;**25**:1070.

- 1  
2  
3  
4  
5  
6  
7  
8  
9  
10  
11  
12  
13  
14  
15  
16  
17  
18  
19  
20  
21  
22  
23  
24  
25  
26  
27  
28  
29  
30  
31  
32  
33  
34  
35  
36  
37  
38  
39  
40  
41  
42  
43  
44  
45  
46  
47  
48  
49  
50  
51  
52  
53  
54  
55  
56  
57  
58  
59  
60
17. Rodriguez G, Moreno LA, Blay MG, et al. Body fat measurement in adolescents: comparison of skinfold thickness equations with dual-energy X-ray absorptiometry. *Eur J Clin Nutr* 2005;**59**:1158-66.
18. Wickramasinghe VP, Lamabadusuriay SP, Cleghorn GJ, et al. Use of skin-fold thickness in Sri Lankan children: Comparison of several prediction equations. *Indian Journal of Pediatrics* 2008;**75**:1237-42.
19. Midorikawa T, Ohta M, Hikiyama Y, et al. Predicting total fat mass from skinfold thicknesses in Japanese prepubertal children: a cross-sectional and longitudinal validation. *Asia Pac J Clin Nutr* 2011;**20**:426-31.

**Table 1:** Baseline Demographic and measured values of studied subjects

| Total subjects: 99        |             |              |
|---------------------------|-------------|--------------|
|                           | Males = 54  | Females = 45 |
|                           | mean (SD)   | mean (SD)    |
| Age (yrs)                 | 13.8 (2.0)  | 14.13(2.2)   |
| Weight (kg)*              | 41.7 (12.5) | 43.6 (8.2)   |
| BMI (kg/m <sup>2</sup> )* | 17.7 (3.5)  | 19.0 (3.4)   |
| SC-SF (mm)*               | 9.9 (6.1)   | 14.1 (5.4)   |
| T-SF (mm)*                | 11.4 (7.1)  | 16.0 (6.1)   |
| FM by DZ-Eq               | 8.9 (5.4)   | 12.7 (4.1)   |
| FM by G-Eq                | 20.7 (4.1)  | 28.6 (3.2)   |
| %BF BY SL-Eq              | 10.7 (9.3)  | 13.3 (5.1)   |
| DEXA FM*                  | 8.3 (5.6)   | 10.2 (3.2)   |
| DEXA %BF*                 | 19.1 (7.6)  | 29.6 (5.1)   |

\*: p value <0.05

BMI: Body Mass Index

SC-SF: Subscapular skinfold

T-SF: Tricep Skin Fold

FM: Fat Mass

1  
2  
3 %BF: Percentage Body Fat  
4 DZ-Eq: Dezenberg Equation  
5 G-Eq: Goran Equation  
6 SL-Eq: Slaughter Equation  
7  
8  
9  
10  
11  
12  
13  
14  
15

16 **Table 2:** Correlation coefficients calculated for prediction equations of DZ, G and SL for fat  
17 mass (FM) and percentage body fat (%BF). All equations showed good correlations with  
18 significant p-values of <0.0001.  
19

| Equations | R <sup>2</sup> | SEE  |
|-----------|----------------|------|
| • DZ-FM   | 0.8            | 2.45 |
| • G-FM    | 0.86           | 2.06 |
| • SL-% BF | 0.76           | 3.73 |

20  
21  
22  
23  
24  
25  
26  
27  
28  
29  
30  
31  
32  
33  
34  
35  
36  
37  
38  
39  
40 SEE: Standard Error of Estimate  
41 DZ-FM: Dezenberg Fat Mass  
42 G-FM: Goran Fat Mass  
43 SL %BF: Slaughter Percentage Body Fat  
44  
45  
46  
47  
48  
49  
50  
51  
52  
53  
54  
55  
56  
57  
58  
59  
60

Table 3: Validation criteria for prediction of % body fat and fat mass

|                         | <b>Slaughter</b> | <b>Goran</b>        | <b>Dezenberg</b>   |
|-------------------------|------------------|---------------------|--------------------|
| Correlation             | 0.76             | 0.8                 | 0.86               |
| Accuracy                | 98.4             | 90.3                | 83.7               |
| Bias                    | 0.37<br>(p =0.4) | -1.26<br>(p<0.0001) | 1.48<br>(p<0.0001) |
| Intra-class correlation | 0.82             | 0.85                | 0.85               |

## **LEGENDS**

Figure 1: (1a) Bland Altman plot shows uniform distribution between %BF calculated by DEXA and Slaughter. Although limits of agreement wide more than 75% of sample is between 5% variation; (1b) shows significant overestimation of fat mass between DEXA and Goran equation with almost the entire sample above the zero levels; (1c) shows significant underestimation of fat mass with more than 60% of the sample lying below the 0 level in the Dezenberg equation.

1  
2  
3  
4  
5  
6  
7  
8  
9  
10  
11  
12  
13  
14  
15  
16  
17  
18  
19  
20  
21  
22  
23  
24  
25  
26  
27  
28  
29  
30  
31  
32  
33  
34  
35  
36  
37  
38  
39  
40  
41  
42  
43  
44  
45  
46  
47  
48  
49  
50  
51  
52  
53  
54  
55  
56  
57  
58  
59  
60

For peer review only

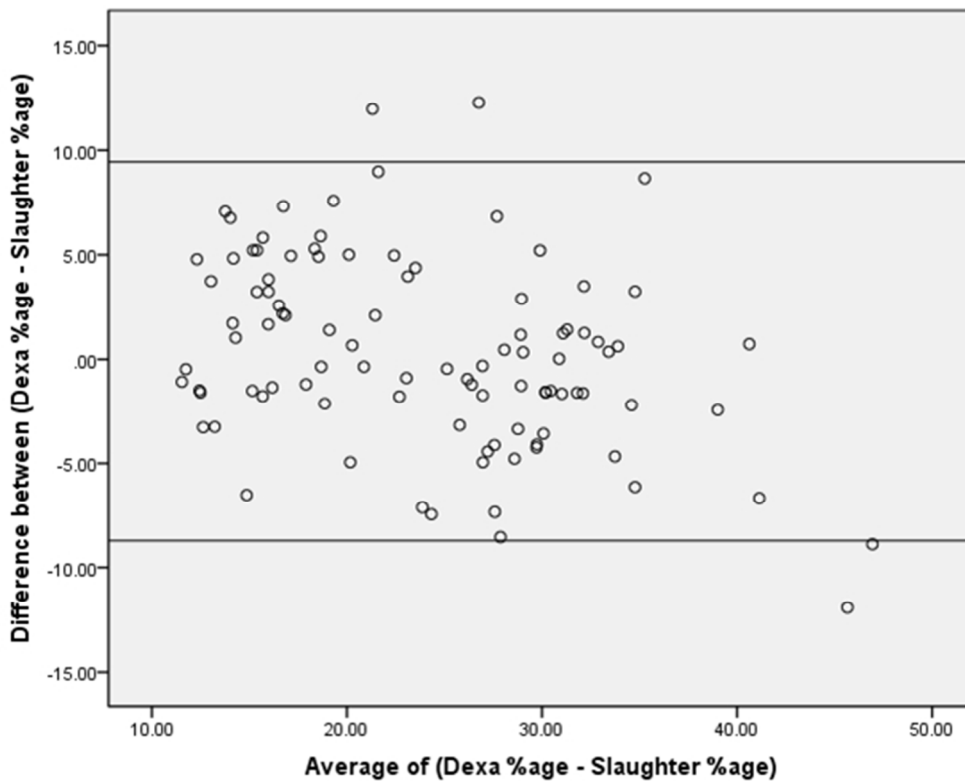

227x181mm (70 x 70 DPI)

ew only

1  
2  
3  
4  
5  
6  
7  
8  
9  
10  
11  
12  
13  
14  
15  
16  
17  
18  
19  
20  
21  
22  
23  
24  
25  
26  
27  
28  
29  
30  
31  
32  
33  
34  
35  
36  
37  
38  
39  
40  
41  
42  
43  
44  
45  
46  
47  
48  
49  
50  
51  
52  
53  
54  
55  
56  
57  
58  
59  
60

1  
2  
3  
4  
5  
6  
7  
8  
9  
10  
11  
12  
13  
14  
15  
16  
17  
18  
19  
20  
21  
22  
23  
24  
25  
26  
27  
28  
29  
30  
31  
32  
33  
34  
35  
36  
37  
38  
39  
40  
41  
42  
43  
44  
45  
46  
47  
48  
49  
50  
51  
52  
53  
54  
55  
56  
57  
58  
59  
60

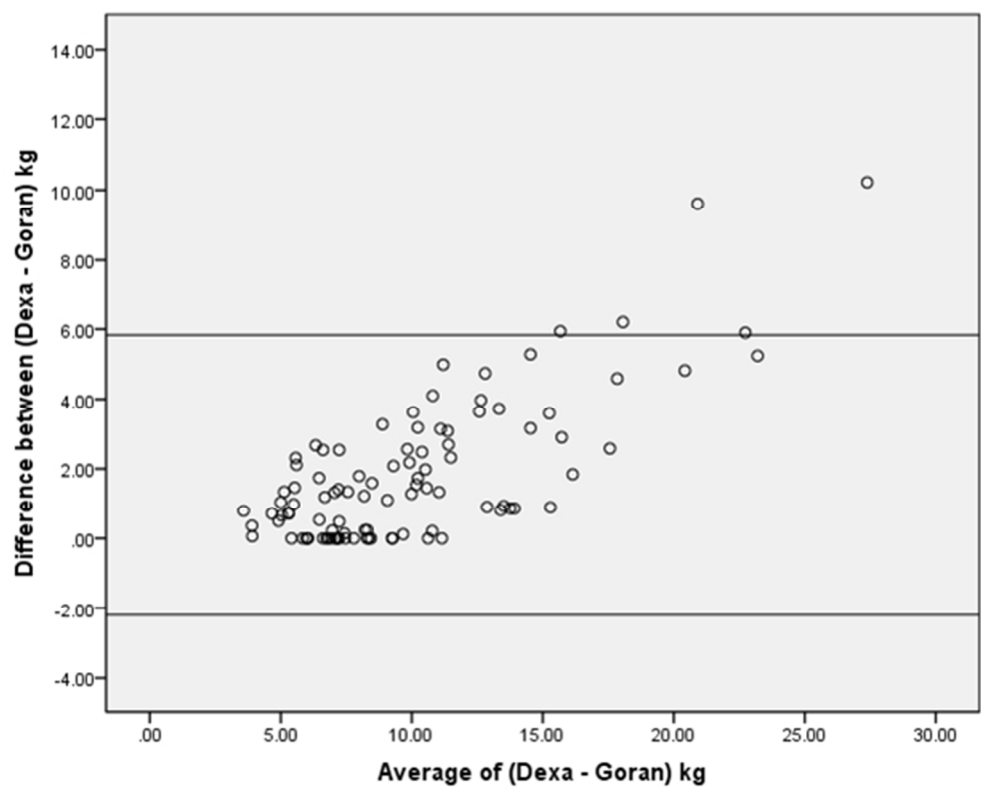

226x181mm (70 x 70 DPI)

ew only



1  
2  
3  
4  
5  
6  
7  
8  
9  
10  
11  
12  
13  
14  
15  
16  
17  
18  
19  
20  
21  
22  
23  
24  
25  
26  
27  
28  
29  
30  
31  
32  
33  
34  
35  
36  
37  
38  
39  
40  
41  
42  
43  
44  
45  
46  
47  
48  
49  
50  
51  
52  
53  
54  
55  
56  
57  
58  
59  
60

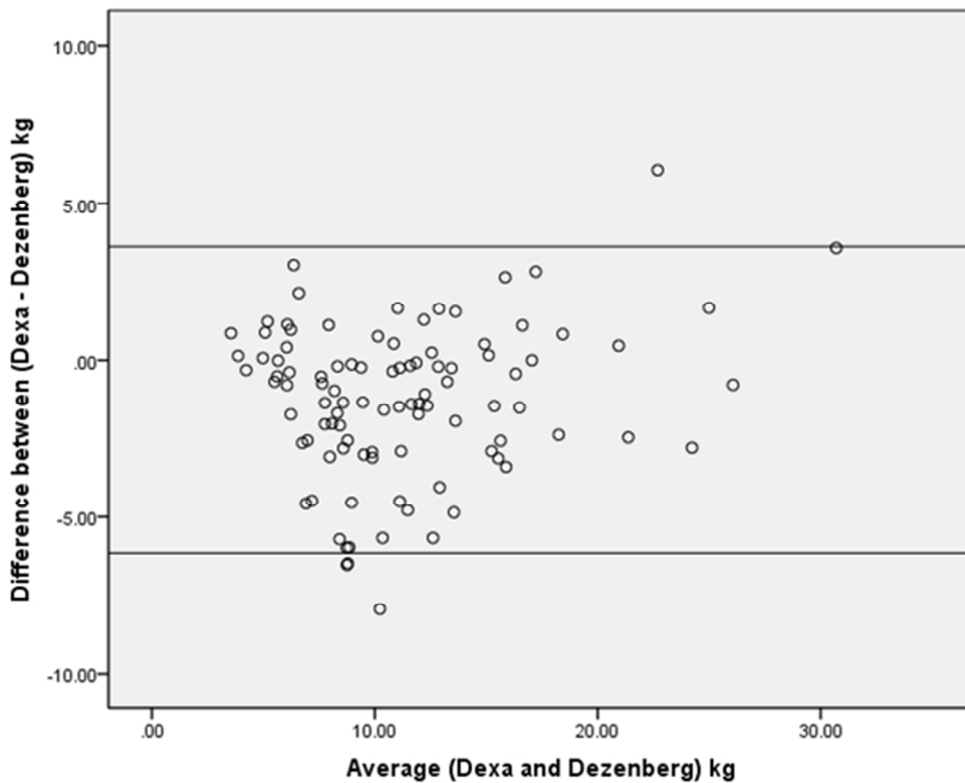

225x180mm (71 x 71 DPI)

ew only

# BMJ Open

## Correlation of skin folds thickness and validation of prediction equations using DEXA as gold standard for estimation of body fat composition in Pakistani children

|                                 |                                                                                                                                                                                                                                                                                                                                              |
|---------------------------------|----------------------------------------------------------------------------------------------------------------------------------------------------------------------------------------------------------------------------------------------------------------------------------------------------------------------------------------------|
| Journal:                        | <i>BMJ Open</i>                                                                                                                                                                                                                                                                                                                              |
| Manuscript ID:                  | bmjopen-2013-004194.R1                                                                                                                                                                                                                                                                                                                       |
| Article Type:                   | Research                                                                                                                                                                                                                                                                                                                                     |
| Date Submitted by the Author:   | 24-Feb-2014                                                                                                                                                                                                                                                                                                                                  |
| Complete List of Authors:       | Hussain, Zainab; Aga Khan University Hospital, Radiology<br>Jafar, Tazeen; Aga Khan University Hospital, Community Health Sciences<br>Zaman, Maseeh uz; Aga Khan University Hospital (AKUH), Radiology<br>Parveen, Riffat; Aga Khan University Hospital, Radiology<br>Saeed, Farzan; Aga Khan University Hospital, Community Health Sciences |
| <b>Primary Subject Heading</b>: | Paediatrics                                                                                                                                                                                                                                                                                                                                  |
| Secondary Subject Heading:      | Radiology and imaging, Epidemiology                                                                                                                                                                                                                                                                                                          |
| Keywords:                       | EPIDEMIOLOGY, NUCLEAR MEDICINE, Paediatric orthopaedics < ORTHOPAEDIC & TRAUMA SURGERY, Paediatric radiology < PAEDIATRICS                                                                                                                                                                                                                   |
|                                 |                                                                                                                                                                                                                                                                                                                                              |

SCHOLARONE™  
Manuscripts

1  
2  
3  
4  
5  
6  
7  
8  
9  
10  
11  
12  
13  
14  
15  
16  
17  
18  
19  
20  
21  
22  
23  
24  
25  
26  
27  
28  
29  
30  
31  
32  
33  
34  
35  
36  
37  
38  
39  
40  
41  
42  
43  
44  
45  
46  
47  
48  
49  
50  
51  
52  
53  
54  
55  
56  
57  
58  
59  
60

# Correlation of skin folds thickness and validation of prediction equations using DEXA as gold standard for estimation of body fat composition in Pakistani children

Zainab Hussain<sup>1</sup>, Tazeen Jafar<sup>2</sup>, Maseeh uz Zaman<sup>1</sup>, Riffat Parveen<sup>1</sup>, Farzan Saeed<sup>2</sup>

1. Department of Radiology, The Aga Khan University Hospital (AKUH), Karachi, Pakistan
2. Department of Community Health Sciences (CHS), The Aga Khan University Hospital (AKUH), Karachi, Pakistan

## Corresponding Author

Maseeh uz Zaman MD, FASNC, FRCP (Edn)  
MBBS, MS, FCPS, FEBNM (EU), DCBNC (USA)  
Associate Professor and Head Section of Nuclear Medicine,  
Department of Radiology, The Aga Khan University Hospital (AKUH), Karachi, Pakistan.  
[maseeh.uzzaman@aku.edu](mailto:maseeh.uzzaman@aku.edu)

## ABSTRACT

Objective: to determine the correlation between Dual Energy X-ray Absorptiometry (DEXA) and skinfold thickness equations (SKF) for estimation of body fat composition in secondary school children and validation of prediction equations by Slaughter, Goran and Dezenberg.

Design: Cross sectional analytical study.

Setting: Joint Commission for International Accredited (JCIA) tertiary care hospital of Karachi, Pakistan from January 2010 till May 2010.

Participants: The study was approved by Hospital's ethical review committee. Written and verbal consents were obtained from principals of two schools and parents of 99 children (mean age of  $14 \pm 1.89$  years; min-max 9-19 years; 54 male and 45 female) accrued in study. DEXA scan was acquired and skin fold thickness was measured at angle of the scapula, iliac crest and mid arm for bicep and triceps skin folds using Holtain calipers. Correlations were established between estimated fat mass (FM) and percentage body fat (%BF) calculated by DEXA and those predicted by prediction equations. On obtaining significant correlation of  $>0.5$ , overall accuracy, precision and bias was calculated.

Results: There was an overall increased adiposity in females with fat mass of 3.57 kg and %BF 6.2% higher than male counterpart ( $p < 0.05$ ). Slaughter equation predicted %BF accurately with overall high accuracy, minimal bias and with good precision with DEXA. Dezenberg and Goran equations had significant bias in prediction of fat mass which was statistically significant with low level of accuracy of the Goran equation.

Conclusion: We conclude that Slaughter equation for estimating %BF showed reasonable validation with DEXA. Nevertheless further studies with consideration for maturity and ethnicity are warranted for better results. However, for estimation of fat mass, previously formulated

1  
2  
3 equations by Goran and Dezenberg showed significant difference in our population. We do  
4  
5 recommend further studies for developing and validation of skin fold equations specific to  
6  
7 Pakistani pediatric population.  
8  
9

10  
11 STRENGTH AND LIMITATIONS: This is the first well designed and conducted study from a  
12  
13 JCIA accredited tertiary care Hospital (Aga Khan University Hospital), Karachi Pakistan. In this  
14  
15 study various well known equations for estimation of percentage body fat and fat mass in  
16  
17 Western population have been validated for Pakistani children. Relatively smaller sample size is  
18  
19 the basic limitation of this research output which warrants and provokes local researchers to do  
20  
21 further studies in future.  
22  
23

24  
25  
26 KEY WORDS: Pediatric Obesity; DEXA; percentage body fat; fat mass; Slaughter; Goran;  
27  
28 Dezenberg; skin fold thickness equations  
29  
30  
31  
32  
33  
34  
35  
36  
37  
38  
39  
40  
41  
42  
43  
44  
45  
46  
47  
48  
49  
50  
51  
52  
53  
54  
55  
56  
57  
58  
59  
60

## INTRODUCTION

Obesity is now being reported as the new world epidemic afflicting more than 1 billion adults globally<sup>1</sup>. According to WHO reports a great number of children (22 million) are afflicted with obesity with a great proportion in the United States, however the developing nations are not to be spared<sup>2</sup>. Analysis of the national health survey in Pakistan for adults reveals that lower BMI thresholds were suggested than those recommended in western population based on their association with outcome of chronic disease<sup>3</sup>. Same situation exists in children. Retrospective analysis of data in Britain revealed that there was an increased risk of obesity in Afro Caribbean and Pakistani girls whereas Indian and Pakistani boys were found to be at higher risk for overweight<sup>4</sup>. In another study it was reported that application of international standards did not provide a reliable result due to significant difference in height at the same ages of children belonging to the Asian and African descent as compared to standard population who showed a greater proportion of central obesity<sup>5</sup>. Based on these results emerged the concept of measuring body fat composition as standardization of BMI as an obesity measurement index across different ethnicities remains to be formulated.

Body fat composition is measured in children using dual energy x-ray absorptiometry (DEXA) as gold standard. Multiple validations of this technique with chemical composition, total body weighting and hydro densitometry have been performed<sup>6-9</sup>. Due to its very small amount of radiation and short procedure time it is ideal for use in children.<sup>10</sup>

However it is not suitable for use in field work as it is not widely available and involves transportation of participants to tertiary care settings. Another method that has been validated

1  
2  
3 and widely used in the west is prediction equations based on anthropometric indices such as  
4  
5  
6 skinfold thickness of the biceps, triceps and abdominal wall as well as waist circumference and  
7  
8  
9 waist hip ratios. The first equations that have been produced have initially derived by Slaughter  
10  
11 et al <sup>11</sup>. In a sample of 310 children and adults age 8-29 yrs. prediction equations were cross  
12  
13 validated against under body weighting using 4 compartment model, bone mineral studies and  
14  
15 body water dilution. Special consideration for ethnicity and maturations was given. Multiple  
16  
17 studies have tried to validate these equations in their population and on failing to do so derive  
18  
19 their own equations. In a study by Goran et al they have previously cross validated DEXA  
20  
21 against pig carcasses in the pediatric weight range and then after adjusting fat mass values with  
22  
23 coefficient they have derived equations in prepubescent children by identifying the best  
24  
25 predictors for fat mass and deploying them in a prediction equation<sup>12</sup>.  
26  
27  
28  
29

30 As a second part of the Goran study, Dezenberg et al also tried to validate the Slaughter and  
31  
32 Goran equations in two different cohorts (the Alabama and the Vermont cohort) across multiple  
33  
34 criteria and on failure to do so went ahead and formulated their own equations by identifying  
35  
36 best predictors <sup>13</sup>. They too also came up with the conclusion that although much work has been  
37  
38 done larger cohorts with different ethnicities is needed to establish the authenticity of prediction  
39  
40 equations for widespread use in field work. As availability of DEXA is limited to larger centers  
41  
42 it is imperative to validate skinfold thickness equations for measurement of obesity in general  
43  
44  
45  
46  
47 population.  
48  
49

50 The purpose of this study was to determine the correlation between DEXA and skinfold  
51  
52 thickness equations for estimation of body fat composition in secondary school children and  
53  
54 validation of prediction equations (Slaughter, Goran and Dezenberg equations) against gold  
55  
56 standard of DEXA by determining agreement and accuracy.  
57  
58  
59  
60

## MATERIAL AND METHODS

This was a cross sectional analytical study conducted in Nuclear Medicine section, Department of Radiology, The Aga Khan University Hospital (AKUH), Karachi, Pakistan from Jan 2010 to May 2010-. The study was approved by AKUH ethical review committee.

The study population consisted of children enrolled form Class five till matriculate in the academic year from August of 2009 till May of 2010 form 2 community based schools belonging to the middle class strata. After the initial approval from the principal and obtaining school consent, a briefing lecture was delivered to the children with diagrammatic presentation of the machine and skin fold calipers. Thereafter assent forms to be signed by the children themselves and consent forms to be signed by the parents were distributed amongst the children. Furthermore phone numbers were obtained from the school administration and parents called to further explain the procedures and obtain verbal consent as well. All children whose parents gave consent were enrolled and those children from whom consent could not be obtained were excluded.

The sampling strategy was convenient sampling where consecutive children were enrolled till completion of sample size. A sample size of 44 subjects was needed to achieve 90% power to detect a change in slope from 0.0 under the null hypothesis to 0.45 under the alternative hypothesis when the standard deviation of the Triceps skin fold is 5.90, the standard deviation of Fat Mass by DEXA is 5.90, and the two-sided significance level is 0.05. These values were obtained from a study performed in children aged 4-10 years<sup>14</sup>. However since 2 schools were included, by considering a design effect of 2, the required sample size was calculated as 88 subjects.



1  
2  
3 Data collection was performed on a designed questionnaire for the study. It included the socio-  
4 demographic data of the subject and all independent variables. Training of the principal  
5 investigator (PI) and the data collector was done according to the National Health & Nutrition  
6 Examination Survey (NHANES) manual<sup>15</sup>. A senior radiologist trained the data collectors for  
7 identification of the anatomical surface landmarks where measurements of the skin fold were to  
8 be obtained namely the angle of the scapula, the iliac crest and the midpoint of the arm for  
9 measuring bicep and triceps skin folds. Intra and inter observer variability was assessed for 10  
10 sets of reading and readings with a discrepancy for more than 0.4 mm were retaken and the  
11 procedure revised. Abdominal and hip circumference was measured using a measuring tape  
12 according to the described technique and a difference of more than one centimeter was  
13 considered unacceptable.  
14  
15  
16  
17  
18  
19  
20  
21  
22  
23  
24  
25  
26  
27  
28  
29

30 DEXA scan was performed on Hologic Discovery-A QDR series, USA. The parameters of the  
31 scan were alternating fan beam radiations of 140 kV and 100 kV with a scan width of 26.4  
32 inches and scan length of maximum 77 inches (195 cm). The participant was asked to change in  
33 a hospital gown and asked to lie straight on the table with hands by the side palms facing down  
34 away from the thighs and look at the ceiling to maintain head position. The body was positioned  
35 within the scan parameters marked on the table. The feet were rotated inwards so that the toes  
36 touched each other and taped so that the position was maintained. The method of performing the  
37 analysis of the estimation for %BF and total fat mass was done in the pediatric whole body scan  
38 mode for children up till 12 years of age. For children aged between 12 years onwards the adult  
39 scan mode was used for the calculation of body fat composition parameters. Reliability between  
40 scans was achieved with phantom calibration.  
41  
42  
43  
44  
45  
46  
47  
48  
49  
50  
51  
52  
53  
54  
55  
56  
57  
58  
59  
60

1  
2  
3 The measure of fat mass and %BF calculated by DEXA were received as a printout from the  
4 scanner and values were entered in the study performa. Prediction of the same parameters via  
5 preformed prediction equations (Slaughter's, Goran and Dezenberg) using skinfold thickness and  
6 anthropometric measures were also made.  
7  
8  
9  
10  
11

12  
13  
14 Body measurements:

15  
16  
17 All body measurements were taken in accordance with the protocol described for anthropometric  
18 measurements in the National Health & Nutrition Examination Survey-3<sup>15</sup>. Body measurements  
19 were taken on the right side of the body.  
20  
21  
22

23  
24 Anthropometric measurements were taken using specially designed calipers (Holtain Calipers).  
25 The measurements included weight, triceps skinfold thickness and sub scapular skinfold  
26 thickness.  
27  
28  
29  
30

31  
32 Weight was measured using a Tanita TBF 305 body fat analyser and weighing scales (Tanita UK  
33 Ltd, Yewsley, Middlesex, UK).  
34  
35  
36  
37  
38  
39  
40  
41

42 *Measuring skin fold thickness:*

43  
44 Skin fold measurements were obtained in various areas of the body such as the anterior and  
45 posterior aspect of the upper arm corresponding to the *Bicep* and *triceps* SF.  
46  
47  
48

49 *Sub scapular SF* was obtained by measuring the subcutaneous tissue beneath the shoulder blade.

50  
51 *Suprailiac SF* was obtained by measuring the fold above the pelvic bone laterally.

52  
53  
54 *Abdominal SF* was measured just adjacent to the umbilicus.

55  
56  
57 *Abdominal circumference* was measured using a measuring tape at the level of the umbilicus.  
58  
59  
60

1  
2  
3 *Hip circumference* was measured at the maximum curvature of the hips.  
4

5  
6 Skinfolds measurements were taken to the nearest 0.1 millimeter. All skinfold measurements  
7  
8 were done in duplicate (i.e., twice by the same investigator) since these measures have the most  
9  
10 variability. Skinfold thickness was measured by Holtain calipers. The procedure was thoroughly  
11  
12 explained to the children and the use of the caliper was demonstrated on the child's palm.  
13  
14

15  
16 The following prediction equations were used:  
17

18  
19 *Fat mass* is obtained as amount of fat calculated in kilograms predicted by the DZ and G  
20  
21 equations  
22

23  
24 Dezenberg equation:  
25

26  
27 
$$\text{FM (kilograms)} = 0.342 \times \text{body mass (kg)} + 0.256 \times \text{triceps SF (mm)} + 0.837 \times \text{sex (1= boy, 2 =}$$
  
28  
29 
$$\text{girl)} - 7.388$$
  
30

31 Goran equation:  
32

33  
34 
$$\text{FM (kg)} = 0.23 (\text{sub scapular SF}) + 0.18 (\text{weight}) + 0.13 (\text{triceps SF}) - 3.0$$
  
35  
36  
37  
38

39 *Percentage body fat* is obtained as a percentage of body fat predicted by the Slaughter equation.  
40

41 *For boys:*  
42

43  
44 
$$\%BF = 1.21 [\text{sum of triceps and subscapular skinfolds in mm}] - 0.008 [\text{sum of triceps and}$$
  
45  
46 
$$\text{subscapular skinfolds in mm}]^2 - 1.7 (\text{coefficient for white Prepubescent boys in boys with sum}$$
  
47  
48 
$$\text{of triceps and subscapular skinfolds} < 35 \text{ mm});$$
  
49

50  
51  
52  
53 *If sum of triceps and subscapular skinfolds > 35 mm,*  
54

55  
56 
$$\%BF = 0.783[\text{Sum of triceps and subscapular skinfolds mm}] - 1.7 \text{ in boys;}$$
  
57  
58  
59  
60

1  
2  
3  
4  
5  
6 *For girls:*  
7  
8  
9

10  
11 %BF = 1.33 [sum of triceps and subscapular skinfolds \_mm] - 0.013 [(sum of triceps and  
12 subscapular skinfolds in mm) <sup>2</sup>] + 3.0 (coefficient for white girls) in girls with sum of triceps and  
13 subscapular skinfolds < 35 mm;  
14  
15

16  
17  
18  
19  
20 *Or if sum of triceps and subscapular skinfolds > 35 mm,*  
21

22 %BF = 0.546 [sum of triceps and subscapular skinfolds in mm] + 9.7 in girls  
23  
24  
25  
26  
27

28 Data for all the independent variables was collected by the PI and assisting technician in the  
29 Dexa room. Two readings were taken for height, weight, abdominal and hip circumference,  
30 triceps, and subscapular and supriliac skin fold thicknesses and the average measurement for  
31 both the readings was taken as the final reading. If a difference of more than 0.3 mm was  
32 recorded the readings were retaken. Calibration of the calipers was performed periodically  
33 according to the calibration block provided by the manufacturers. The stadiometer and weighing  
34 scale were also calibrated and checked for correct position of zero before each data set recording.  
35  
36  
37  
38  
39  
40  
41  
42  
43  
44  
45  
46  
47  
48

49 Statistical analysis: Descriptive statistics were calculated for the data with mean and standard  
50 deviations for all continuous variables. Proportions were described for categorical data such as  
51 gender and independent T-test was applied to assess significant difference among gender.  
52  
53  
54  
55  
56  
57  
58  
59  
60

1  
2  
3 The next step of the analysis was to validate the equation for fat mass and percentage body fat  
4 described by Goran, Dezenberg and Slaughter. In order to do this initially correlations were  
5 established between estimated FM and %BF calculated by DEXA and that predicted by using the  
6  
7  
8  
9  
10 3 equations. On obtaining significant correlation of  $> 0.05$ , precision and bias was calculated.  
11

12  
13  
14 *Accuracy* was defined as the degree of closeness of predicted fat mass and percent body fat  
15 obtained from the equations to their actual criterion value estimated by DEXA and would be  
16 considered significant if more than 90%. This was done by obtaining the overall mean of fat  
17 mass and %BF by DEXA as well as the Dezenberg, Goran and Slaughter equations separately.  
18 Individual accuracies were then calculated by subtracting the predicted mean of percent body fat  
19 and fat mass obtained from the equations from the mean value of fat mass and percentage body  
20 fat calculated by DEXA. The difference was then expressed as a percentage of the mean of the  
21 estimated DEXA value for the 3 equations..  
22  
23  
24  
25  
26  
27  
28  
29  
30  
31

32  
33 *Precision* was defined as the variation between the predicted and estimated values of %BF and  
34 FM within the data and was assessed as the average of the difference between FM and %BF  
35 measured by DEXA and that predicted by the equations and plotting the mean of errors against 0  
36 using paired samples t-test.  
37  
38  
39  
40  
41  
42

43 Bland Altman plots were also generated for evaluation of agreement and bias. Based on the  
44 above mentioned criteria the equation for %BF by Slaughter and for fat mass by Dezenberg and  
45 Slaughter were rendered valid or rejected. Post hoc regression analysis was also performed with  
46 the line of identity against predicted versus estimated fat mass and percent body fat. A  
47 commercial Statistical Package for Social Sciences (SPSS Version 17) was used for these  
48 measurements.  
49  
50  
51  
52  
53  
54  
55  
56  
57  
58  
59  
60

## RESULTS

### *Descriptive analysis and gender difference:*

Ninety nine (n= 99) subjects were registered with a mean age of  $14 \pm 1.89$  years (min-max 9-19 yrs) with 54 male and 45 female subjects. There was an evidence of overall increase in the adiposity of females as compared to males. All skin fold measures as well as fat composition variables were significantly higher in girls with p-value  $< 0.05$ . After assigning the binary variables it was observed that there was a difference of 3.57 kg fat mass present in excess in females as compared to the males as calculated by DEXA (p-value  $< 0.0001$ ). Significant differences were also obtained for %BF which was 6.2 % more in females as compared to males (p-value  $< 0.05$ ). (Table 1)

After obtaining baseline data, the equations were applied to the sample for prediction of fat mass by Dezenberg and Goran as well as %BF by Slaughter. In the linear regression analysis strong correlations were obtained between the predicted values and the criterion values by DEXA with p-value  $< 0.0001$ . (Table 2).

### *Validation of equations:*

### *Overall accuracy:*

1  
2  
3 The overall accuracy for the Slaughter equation was 98.4% which was very high and Dezenberg  
4  
5 equation had an overall accuracy of 90.3% which was just within the cut-off designed. Goran  
6  
7 equation showed weak overall accuracy of 83% which did not fall within the cutoff defined.  
8  
9

#### 10 11 *Variation/Precision of equations* 12

13  
14 No significant difference was obtained between the Slaughter equation predicting %BF and that  
15  
16 estimated by DEXA with a difference of 0.37 kg (p-value 0.425). However, significant  
17  
18 differences for predicting fat mass were obtained between DEXA and Dezenberg. The equation  
19  
20 underestimated the fat mass with a bias of 1.26 kg which was statistically significant (p-value  
21  
22 <0.0001). While Goran equation overestimated the fat mass with a bias of 1.48 kg which was  
23  
24 statistically significant with a p-value of <0.0001  
25  
26  
27  
28  
29  
30  
31  
32

#### 33 *Calculating Bias:* 34

35  
36 Limits of agreement were evaluated using Bland Altman analysis. The slaughter equation  
37  
38 revealed that more than 75% of the data was within the first standard deviation.  
39  
40  
41  
42  
43  
44

45 Thus in view of the above criteria the Slaughter equation fulfilled all the criteria for predicting  
46  
47 %BF accurately as the overall accuracy is high with minimal variation which is not statistically  
48  
49 significant and showing good precision with %BF measured by DEXA. Furthermore more than  
50  
51 75% of the readings were within 5% of the estimated DEXA values.  
52  
53  
54  
55  
56  
57  
58  
59  
60

1  
2  
3 The Dezenberg and Goran equations had significant variation in prediction of fat mass which  
4 was statistically significant with low level of accuracy of the Goran equation. A summary of the  
5 results is shown in Table 3  
6  
7  
8  
9

10  
11 Post hoc regression analysis revealed that both the Goran and Dezenberg equation did not reveal  
12 an intercept significantly different from zero. The Slaughter equation did not reveal an intercept  
13 significantly different from zero against estimated fat mass however the intercept was  
14 significantly different from zero when it was assessed against estimated percent body fat (Fig 1).  
15  
16  
17  
18  
19  
20  
21  
22  
23  
24  
25  
26  
27  
28  
29  
30  
31  
32  
33  
34  
35  
36  
37  
38  
39  
40  
41  
42  
43  
44  
45  
46  
47  
48  
49  
50  
51  
52  
53  
54  
55  
56  
57  
58  
59  
60



## DISCUSSION

The onset of obesity in the pediatric population has shown early precedence of atherosclerotic changes and diabetes mellitus with the onset of metabolic syndrome thus rendering obesity as a major health concern. Thus with this background we set out to conduct a study for the measurement of obesity in our pediatric population. A new technique of predicting body fat composition is by prediction equations (Salughter<sup>11</sup>, Goran<sup>12</sup>, and Dezenberg<sup>13</sup> equations) which have been developed for the western world. We attempted to validate these equations to predict body fat composition in our pediatric population which comprised of fat mass and %BF using DEXA as the gold standard. In this study only the Slaughter equation was validated for predicting %BF with a good correlation and high accuracy (98.4%). No significant bias was seen amongst the predicted and estimated method for measuring %BF. These equations have been validated in different studies and used widely. In a study carried out by Janz in 122 subjects of pre and post pubescent children ranging from 8-17 years very high intra class correlations (0.98-0.99) and high validity correlations of (0.79-0.99) were achieved<sup>16</sup>. In another study conducted in Zaragoza, Spain carried out on 237 adolescents it was found that the Slaughter equations had the narrowest limits of agreement as compared to the other equations and did not show statistically significant bias<sup>17</sup>. Our results have been similar with the equation showing validity across all criteria.

In the study by Goran et al, after failing to validate the Slaughter equation they derived an equation for their own sample. It was reported that all skin folds showed higher correlations with fat mass rather than percent body fat so equation for the prediction of fat mass was generated.

1  
2  
3 Another method of calculating fat composition was also deployed in this study using  
4 bioelectrical impedance analysis. They found the variables of triceps, sub scapular and weight  
5 significantly correlating. The equation was further cross validated on 1/3<sup>rd</sup> of the sample  
6 according to the criteria of Lohman which consisted of assessing the difference between the  
7 predicted and estimated fat mass as well as minimal increase of the SEE. Only the R<sup>2</sup> was  
8 reported of 0.88.  
9  
10  
11  
12  
13  
14  
15  
16  
17  
18  
19  
20

21 This equation was then further cross validated in the study by Dezenberg. In his study after  
22 initially failing to validate the Goran and Slaughter equation, a prediction equation was  
23 formulated across a sample of different ethnic cohorts consisting of both black and white  
24 population. The predictors considered significant were weight; triceps skin fold, gender, ethnicity  
25 and abdominal skin fold. However since we were not evaluating ethnicity, the equation adopted  
26 in this study consisted only of weight, triceps skin fold and gender predictors. A significant point  
27 of concern in this study was the fact that regression analysis was performed between percentage  
28 body fat as predicted by Slaughter against fat mass as predicted by dxa. Since both variables  
29 were in different units the inability to validate the equations appeared inevitable. In our study  
30 adopting the approach of Dezenberg et al we achieved good correlation with the intercept not  
31 significantly different from zero with Slaughter equations predicting percent body fat and fat  
32 mass in kilograms estimated by dxa (fig 2d) however the regression analysis between predicted  
33 percent body fat and that estimated with dxa shows an intercept significantly different from  
34 zero. Despite this as multiple validation criteria were applied and the Slaughter equation  
35 maintained robustness across all of them it can be used with some considerations of maturity  
36 specificity and ethnicity in our population.  
37  
38  
39  
40  
41  
42  
43  
44  
45  
46  
47  
48  
49  
50  
51  
52  
53  
54  
55  
56  
57  
58  
59  
60

1  
2  
3 Our results were similar to the results by Eisenmann who evaluated a number of equations along  
4 with bioelectrical impedance analysis. In his study he found that the Slaughter equations  
5 consisting of triceps and subscapular skinfold were showing better limits of agreement and  
6 reduced bias there only one of the slaughter equations was adopted. Significant differences were  
7 assessed between the methods for evaluating body fat composition by DEXA and SF equations,  
8 bioelectrical impedance.  
9

10  
11 A few issues are worthy of mention here. These results could be explained by the application of  
12 coefficients that were derived for the western population. Therefore determining coefficients for  
13 the predictors used in the Dezenberg equation and deriving a prediction equation that is sample  
14 specific could possibly yield better results.  
15  
16  
17  
18  
19  
20  
21  
22  
23  
24  
25  
26  
27  
28  
29  
30  
31

32 Another reason for inability to validate the DZ equation might be that our sample consisted of  
33 both pre and post pubescent children. The application of maturity specific coefficients by  
34 performing the Tanner staging might have different results as these were conducted on children  
35 who were prepubescent. Furthermore data regarding the ethnic origin and socio demographic  
36 status was also not applied. However all children were living in the same town going to  
37 community center schools with a middle class status.  
38  
39  
40  
41  
42  
43  
44  
45  
46  
47  
48  
49

50 The Goran equation also was established on a cohort of children whose mean age was much  
51 lower than that of our sample. Furthermore gender was not accounted for in the equation we used  
52 whereas in our population significant differences were found between boys and girls for fat mass  
53 as well as all skin folds.  
54  
55  
56  
57  
58  
59  
60

1  
2  
3  
4  
5  
6  
7 Very few studies have been done regionally in the South Asian population. In a study conducted  
8  
9 in Sri Lanka in 282 children ages ranging from 5-15 years were tested for predicted %BF using  
10  
11 multiple equations as well as Slaughter equation<sup>18</sup>. Although the bias calculated (-11.6 to 5.8)  
12  
13 was not significant but the limits of agreement were high with significant underestimation of  
14  
15 %BF rendering the equation invalid. An explanation for these results could be the criterion  
16  
17 method that was used which was isotope dilution. No results have been stated for validation  
18  
19 against DEXA. In our study bias was not significant and more than 75% of the sample lied  
20  
21 between a 5% variation as compared to DEXA. In 2010 a study was conducted in Hong Kong  
22  
23 where children aged 9-19 were recruited and skin fold thickness were validated with subsequent  
24  
25 formation of new equations<sup>19</sup>. However again the criterion used was air displacement  
26  
27 plethysmography with only a subset validation with DEXA. They found significant difference  
28  
29 between %BF estimated by the Slaughter equation although the absolute value was only of  
30  
31 1.52%. This was negated by our study which could be explained by the criterion method as being  
32  
33 different and a significant difference in ethnicity. To the best of our understanding this is the  
34  
35 first study conducted in Pakistani pediatric population to determine the correlation and validation  
36  
37 of skinfold thickness equations for estimation of body fat composition using DEXA as gold  
38  
39 standard.  
40  
41  
42  
43  
44  
45  
46  
47  
48  
49  
50  
51  
52  
53  
54  
55  
56  
57  
58  
59  
60

## LIMITATIONS:

Due to the addition of 2 schools the effect of institution was added as a result of which the formation and validation of fat mass equation for our population could not be assessed as the control group and validation group had significant differences between them.

As the age range was wide, different levels of maturity needed to be assessed by the Tanner staging.

Data for ethnic origin and socio-demographics was not held in consideration.

Furthermore the cut-off for accuracy to be deemed significant was 90% which was an arbitrary figure and not used previously. However the Slaughter equation revealed a figure of 98.4% which is very high.

In post hoc analysis regression analysis was performed for checking the line of identity in measured versus predicted fat mass and percent body fat. Although the Dezenberg and Goran equations revealed higher correlations with intercept not statistically different from 0 they were showing significant differences in fat mass prediction. While the Slaughter equation was showing an intercept different from 0 it was fulfilling all other criteria and we believe that if studies with larger sample size and accounting for ethnicity and maturity specific coefficients are performed it will stand its robustness.

## CONCLUSIONS

We conclude that the Slaughter equation for estimating %BF showed reasonably strong validation with DEXA. However for interchangeable use with DEXA further studies with larger sample sizes and maturity considerations need to be conducted.

However, for estimation of fat mass, the previously formulated equations by Goran and Dezenberg revealed significant difference in our population. We do recommend further cross-validation studies for developing and validation of skin fold equation specific to Pakistani pediatric population.

1  
2  
3 ACKNOWLEDGMENT  
4  
5

6 We would like to acknowledge the department of community health sciences for their support in  
7 carrying out the logistics of the study. The authors would also acknowledge the efforts of Dr.  
8 Nadeem Ahmad ex chairperson for his support in the project.  
9  
10  
11  
12

13  
14 CONTRIBUTORSHIP STATEMENT:  
15

16  
17 All authors have substantially contributed to conception and design of study, acquisition of data,  
18 analysis and interpretation of data and preparatio of masnuscripty.  
19  
20  
21  
22

23 CONFLICT OF INTEREST:  
24

25  
26 This study was funded by the university research council of Aga Khan University hospital and  
27 was part of the thesis requirement for Master's program  
28  
29  
30  
31

32 DATA SHARING STATEMENT  
33

34  
35 We are read to share data with the editorial board as per BMJ policy. No additional unpublished  
36 data is available.  
37  
38  
39  
40  
41  
42  
43  
44  
45  
46  
47  
48  
49

50 REFERENCES  
51

- 52  
53  
54 1. Puska P, Nishida C. Obesity and overweight. World health organization; global strategy  
55 on diet, physical activity and health. 2003  
56  
57  
58  
59  
60

- 1  
2  
3  
4 2. Young-Hyman D, Schlundt DG, Herman L, et al. Evaluation of the insulin resistance  
5  
6 syndrome in 5- to 10-year-old overweight/obese African-American children. *Diabetes*  
7  
8 *Care* 2001;24:1359–64.
- 9  
10  
11 3. Yusuf S, Hawken S, Ounpuu S, et al. Effect of potentially modifiable risk factors  
12  
13 associated with myocardial infarction in 52 countries (the INTERHEART study): case-  
14  
15 control study. *Lancet* 2004;364:937-52.
- 16  
17  
18 4. Strauss R, Pollack H. Epidemic increase in childhood overweight, 1986-1998.  
19  
20  
21 *JAMA* 2001;286:2845-48.
- 22  
23  
24 5. Cole T, Bellizzi M, Flegal K, et al. Establishing a standard definition for child overweight  
25  
26 and obesity worldwide: international survey. *BMJ* 2000;320:1240
- 27  
28  
29 6. Wang ZM, Pierson Jr RN, Heymsfield SB. The five-level model: a new approach to  
30  
31  
32 organizing body-composition research. *Am Soc Nutrition* 1992. p. 19-28.
- 33  
34  
35 7. Johansson AG, Forslund A, Sjödin A, et al. Determination of body composition - a  
36  
37  
38 comparison of dual-energy x-ray absorptiometry and hydrodensitometry. *Am J ourl Clin*  
39  
40  
41 *Nut* 1993;57:323–26.
- 42  
43  
44 8. Pintauro S, Nagy TR, Duthie C, et al. Cross-calibration of fat and lean measurements by  
45  
46  
47 dual energy x-ray absorptiometry to pig carcass analysis in the pediatric body weight  
48  
49  
50 range. *Am J ourl Clin Nut* 1996;63: 293–99.
- 51  
52  
53 9. Wang ZM, Pierson Jr RN, Heymsfield SB. The five-level model: a new approach to  
54  
55  
56 organizing body-composition research. *Am Soc Nutrition*; 1992. p. 19-28
- 57  
58  
59  
60



- 1  
2  
3 10. Ellis J, Shypailo R, Pratt J, et al. Accuracy of dual energy x-ray absorptiometry in  
4  
5 children for body composition measurements. *Am J Clin Nutr* 1994;60:660-65.  
6  
7
- 8 11. Slaughter MH, Lohman TG, Boileau RA, et al. Skinfold equations for estimation of body  
9  
10 fitness in children and youth. *Human Biology* 1988;60:709–23.  
11  
12
- 13 12. Goran M, Driscoll P, Johnson R, et al. Cross-calibration of body-composition techniques  
14  
15 against dual-energy X-ray absorptiometry in young children. *Am J Clin Nutr*  
16  
17 1996;63:299-305.  
18  
19
- 20 13. Dezenberg CV, Nagy TR, Gower BA, et al. Predicting body composition from  
21  
22 anthropometry in preadolescent children. *Int J Obes* 1999;23:253–59.  
23  
24  
25
- 26 14. Eisenmann J, Heelan K, Welk G. Assessing body composition among 3- to 8-year-old  
27  
28 children: anthropometry, BIA, and DXA. *Obesity Research* 2004;12:1633–40.  
29  
30
- 31 15. National health and nutrition examination survey III. Body Measurements  
32  
33 (Anthropometry). Westat, Inc. 1650 Research Boulevard. Rockville, MD 20850 ...  
34  
35 [www.cdc.gov/nchs/data/nhanes/nhanes3/cdrom/.../ANTHRO.PDF](http://www.cdc.gov/nchs/data/nhanes/nhanes3/cdrom/.../ANTHRO.PDF)  
36  
37  
38
- 39 16. Janz KF, Nielsen DH, Cassady SL, et al. Cross-validation of the Slaughter skinfold  
40  
41 equations for children and adolescents. *Medicine & Science in Sports & Exercise*  
42  
43 1993;25:1070.  
44  
45  
46
- 47 17. Rodriguez G, Moreno LA, Blay MG, et al. Body fat measurement in adolescents:  
48  
49 comparison of skinfold thickness equations with dual-energy X-ray absorptiometry. *Eur J*  
50  
51 *Clin Nutr* 2005;59:1158-66.  
52  
53  
54  
55  
56  
57  
58  
59  
60

- 1  
2  
3  
4 18. Wickramasinghe VP, Lamabadusuriay SP, Cleghorn GJ, et al. Use of skin-fold thickness  
5  
6 in Sri Lankan children: Comparison of several prediction equations. Indian Journal of  
7  
8 Pediatrics 2008;75:1237-42.  
9  
10  
11 19. Midorikawa T, Ohta M, Hikiyara Y, et al. Predicting total fat mass from skinfold  
12  
13 thicknesses in Japanese prepubertal children: a cross-sectional and longitudinal  
14  
15 validation. Asia Pac J Clin Nutr 2011;20:426-31.  
16  
17  
18  
19  
20  
21  
22  
23  
24  
25  
26  
27  
28  
29  
30  
31  
32  
33  
34  
35  
36  
37  
38  
39  
40  
41  
42  
43  
44  
45  
46  
47  
48  
49  
50  
51  
52  
53  
54  
55  
56  
57  
58  
59  
60

Table 1: Baseline Demographic and measured values of studied subjects

| Total subjects: 99        |             |              |
|---------------------------|-------------|--------------|
|                           | Males = 54  | Females = 45 |
|                           | mean (SD)   | mean (SD)    |
| Age (yrs)                 | 13.8 (2.0)  | 14.13(2.2)   |
| Weight (kg)*              | 41.7 (12.5) | 43.6 (8.2)   |
| BMI (kg/m <sup>2</sup> )* | 17.7 (3.5)  | 19.0 (3.4)   |
| SC-SF (mm)*               | 9.9 (6.1)   | 14.1 (5.4)   |
| T-SF (mm)*                | 11.4 (7.1)  | 16.0 (6.1)   |
| FM by DZ-Eq               | 8.9 (5.4)   | 12.7 (4.1)   |
| FM by G-Eq                | 20.7 (4.1)  | 28.6 (3.2)   |
| %BF BY SL-Eq              | 10.7 (9.3)  | 13.3 (5.1)   |
| DEXA FM*                  | 8.3 (5.6)   | 10.2 (3.2)   |
| DEXA %BF*                 | 19.1 (7.6)  | 29.6 (5.1)   |

\*: p value <0.05

BMI: Body Mass Index

SC-SF: Subscapular skinfold

T-SF: Tricep Skin Fold

FM: Fat Mass

%BF: Percentage Body Fat

DZ-Eq: Dezenberg Equation

G-Eq: Goran Equation

SL-Eq: Slaughter Equation

Table 2: Correlation coefficients calculated for prediction equations of DZ, G and SL for fat mass (FM) and percentage body fat (%BF). All equations showed good correlations with estimated fat mass and percentage body fat using DEXA showing significant p-values of <0.0001.

| Equations | R <sup>2</sup> | SEE  |
|-----------|----------------|------|
| • DZ-FM   | 0.8            | 2.45 |
| • G-FM    | 0.86           | 2.06 |
| • SL-% BF | 0.76           | 3.73 |

SEE: Standard Error of Estimate

DZ-FM: Dezenberg Fat Mass

G-FM: Goran Fat Mass

SL %BF: Slaughter Percentage Body Fat

Table 3: Validation criteria for prediction of % body fat and fat mass

|             | Slaughter        | Goran               | Dezenberg          |
|-------------|------------------|---------------------|--------------------|
| Correlation | 0.76             | 0.8                 | 0.86               |
| Accuracy    | 98.4             | 90.3                | 83.7               |
| Precision   | 0.37<br>(p =0.4) | -1.26<br>(p<0.0001) | 1.48<br>(p<0.0001) |

According to all 3 criteria the Slaughter equation showed consistency good correlation, very high accuracy and good precision using paired t-test.

## LEGENDS

Figure 1: (1a) Bland Altman plot shows uniform distribution between %BF calculated by DEXA and Slaughter. Although limits of agreement wide more than 75% of sample is between 5% variation; (1b) shows significant overestimation of fat mass between DEXA and Goran equation with almost the entire sample above the zero levels; (1c) shows significant underestimation of fat mass with more than 60% of the sample lying below the 0 level in the Dezenberg equation.

Figure 2: (2a,b) regression analysis with line of identity shows the intercept at an angle of 45 degrees not significantly different from zero in both the Dezenberg and Goran equations. Fig 2c reveals the regression analysis with line of identity between Slaughter %BF and estimated %BF DEXA with intercept significantly different from zero. Fig 2d reveals intercept not significantly different from zero between the SL equation for %BF and FM estimated by DEXA.

1  
2  
3  
4  
5  
6  
7  
8  
9

## Correlation of skin folds thickness and validation of prediction equations using DEXA as gold standard for estimation of body fat composition in Pakistani children

10  
11  
12  
13

Zainab Hussain<sup>1</sup>, Tazeen Jafar<sup>2</sup>, Maseeh uz Zaman<sup>1</sup>, Riffat Parveen<sup>1</sup>, Farzan Saeed<sup>2</sup>

- 14  
15  
16  
17  
18  
19
1. Department of Radiology, The Aga Khan University Hospital (AKUH), Karachi, Pakistan
  2. Department of Community Health Sciences (CHS), The Aga Khan University Hospital (AKUH), Karachi, Pakistan

20  
21  
22  
23  
24

### Corresponding Author

25  
26  
27  
28  
29  
30  
31  
32  
33  
34  
35  
36  
37  
38  
39  
40  
41  
42  
43  
44  
45  
46  
47  
48  
49  
50  
51  
52  
53  
54  
55  
56  
57  
58  
59  
60

Maseeh uz Zaman MD, FASNC, FRCP (Edn)  
MBBS, MS, FCPS, FEBNM (EU), DCBNC (USA)  
Associate Professor and Head Section of Nuclear Medicine,  
Department of Radiology, The Aga Khan University Hospital (AKUH), Karachi, Pakistan.  
[maseeh.uzzaman@aku.edu](mailto:maseeh.uzzaman@aku.edu)

## **ABSTRACT**

**Objective:** to determine the correlation between Dual Energy X-ray Absorptiometry (DEXA) and skinfold thickness equations (SKF) for estimation of body fat composition in secondary school children and validation of prediction equations by Slaughter, Goran and Dezenberg.

**Design:** Cross sectional analytical study.

**Setting:** Joint Commission for International Accredited (JCIA) tertiary care hospital of Karachi, Pakistan from January 2010 till May 2010.

**Participants:** The study was approved by Hospital's ethical review committee. Written and verbal consents were obtained from principals of two schools and parents of 99 children (mean age of  $14 \pm 1.89$  years; min-max 9-19 years; 54 male and 45 female) accrued in study. DEXA scan was acquired and skin fold thickness was measured at angle of the scapula, iliac crest and mid arm for bicep and triceps skin folds using Holtain calipers. Correlations were established between estimated fat mass (FM) and percentage body fat (%BF) calculated by DEXA and those predicted by prediction equations. On obtaining significant correlation of  $>0.5$ , overall accuracy, **precision** and bias was calculated.

**Results:** There was an overall increased adiposity in females with fat mass of 3.57 kg and %BF 6.2% higher than male counterpart ( $p < 0.05$ ). Slaughter equation predicted %BF accurately with overall high accuracy, minimal bias and with good **precision** with DEXA. Dezenberg and Goran equations had significant bias in prediction of fat mass which was statistically significant with low level of accuracy of the Goran equation.

**Conclusion:** We conclude that Slaughter equation for estimating %BF showed reasonable validation with DEXA. Nevertheless further studies with consideration for maturity and ethnicity are warranted for better results. However, for estimation of fat mass, previously formulated



1  
2  
3 equations by Goran and Dezenberg showed significant difference in our population. We do  
4  
5 recommend further studies for developing and validation of skin fold equations specific to  
6  
7 Pakistani pediatric population.  
8  
9

10  
11 **STRENGTH AND LIMITATIONS:** This is the first well designed and conducted study from a  
12  
13 JCIA accredited tertiary care Hospital (Aga Khan University Hospital), Karachi Pakistan. In this  
14  
15 study various well known equations for estimation of percentage body fat and fat mass in  
16  
17 Western population have been validated for Pakistani children. Relatively smaller sample size is  
18  
19 the basic limitation of this research output which warrants and provokes local researchers to do  
20  
21 further studies in future.  
22  
23

24  
25  
26 **KEY WORDS:** Pediatric Obesity; DEXA; percentage body fat; fat mass; Slaughter; Goran;  
27  
28 Dezenberg; skin fold thickness equations  
29  
30  
31  
32  
33  
34  
35  
36  
37  
38  
39  
40  
41  
42  
43  
44  
45  
46  
47  
48  
49  
50  
51  
52  
53  
54  
55  
56  
57  
58  
59  
60

## INTRODUCTION

Obesity is now being reported as the new world epidemic afflicting more than 1 billion adults globally<sup>1</sup>. According to WHO reports a great number of children (22 million) are afflicted with obesity with a great proportion in the United States, however the developing nations are not to be spared<sup>2</sup>. Analysis of the national health survey in Pakistan for adults reveals that lower BMI thresholds were suggested than those recommended in western population based on their association with outcome of chronic disease<sup>3</sup>. Same situation exists in children. Retrospective analysis of data in Britain revealed that there was an increased risk of obesity in Afro Caribbean and Pakistani girls whereas Indian and Pakistani boys were found to be at higher risk for overweight<sup>4</sup>. In another study it was reported that application of international standards did not provide a reliable result due to significant difference in height at the same ages of children belonging to the Asian and African descent as compared to standard population who showed a greater proportion of central obesity<sup>5</sup>. Based on these results emerged the concept of measuring body fat composition as standardization of BMI as an obesity measurement index across different ethnicities remains to be formulated.

Body fat composition is measured in children using dual energy x-ray absorptiometry (DEXA) as gold standard. Multiple validations of this technique with chemical composition, total body weighting and hydro densitometry have been performed<sup>6-9</sup>. Due to its very small amount of radiation and short procedure time it is ideal for use in children.<sup>10</sup>

However it is not suitable for use in field work as it is not widely available and involves transportation of participants to tertiary care settings. Another method that has been validated

1  
2  
3 and widely used in the west is prediction equations based on anthropometric indices such as  
4  
5  
6 skinfold thickness of the biceps, triceps and abdominal wall as well as waist circumference and  
7  
8  
9 waist hip ratios. **The first equations that have been produced have initially derived by**  
10  
11 **Slaughter et al <sup>11</sup>. In a sample of 310 children and adults age 8-29 yrs. prediction equations**  
12  
13 **were cross validated against under body weighting using 4 compartment model, bone**  
14  
15 **mineral studies and body water dilution. Special consideration for ethnicity and**  
16  
17 **maturations was given. Multiple studies have tried to validate these equations in their**  
18  
19 **population and on failing to do so derive their own equations. In a study by Goran et al**  
20  
21 **they have previously cross validated DEXA against pig carcasses in the pediatric weight**  
22  
23 **range and then after adjusting fat mass values with coefficient they have derived equations**  
24  
25 **in prepubescent children by identifying the best predictors for fat mass and deploying them**  
26  
27 **in a prediction equation<sup>12</sup>.**

28  
29  
30  
31  
32  
33 **As a second part of the Goran study, Dezenberg et al also tried to validate the Slaughter**  
34  
35 **and Goran equations in two different cohorts (the Alabama and the Vermont cohort)**  
36  
37 **across multiple criteria and on failure to do so went ahead and formulated their own**  
38  
39 **equations by identifying best predictors <sup>13</sup>. They too also came up with the conclusion that**  
40  
41 **although much work has been done larger cohorts with different ethnicities is needed to**  
42  
43 **establish the authenticity of prediction equations for widespread use in field work. As**  
44  
45 **availability of DEXA is limited to larger centers it is imperative to validate skinfold thickness**  
46  
47 **equations for measurement of obesity in general population.**

48  
49  
50  
51  
52  
53 The purpose of this study was to determine the correlation between DEXA and skinfold  
54  
55 thickness equations for estimation of body fat composition in secondary school children and  
56  
57  
58  
59  
60

1  
2  
3 validation of prediction equations (Slaughter, Goran and Dezenberg equations) against gold  
4 standard of DEXA by determining agreement and accuracy.  
5  
6  
7  
8  
9

## 10 MATERIAL AND METHODS

11  
12 This was a cross sectional analytical study conducted in Nuclear Medicine section, Department  
13 of Radiology, The Aga Khan University Hospital (AKUH), Karachi, Pakistan from Jan 2010 to  
14 May 2010-. The study was approved by AKUH ethical review committee.  
15  
16  
17  
18  
19

20  
21 The study population consisted of children enrolled form Class five till matriculate in the  
22 academic year from August of 2009 till May of 2010 form 2 community based schools belonging  
23 to the middle class strata. After the initial approval from the principal and obtaining school  
24 consent, a briefing lecture was delivered to the children with diagrammatic presentation of the  
25 machine and skin fold calipers. Thereafter assent forms to be signed by the children themselves  
26 and consent forms to be signed by the parents were distributed amongst the children.  
27  
28 Furthermore phone numbers were obtained from the school administration and parents called to  
29 further explain the procedures and obtain verbal consent as well. All children whose parents gave  
30 consent were enrolled and those children from whom consent could not be obtained were  
31 excluded.  
32  
33  
34  
35  
36  
37  
38  
39  
40  
41  
42  
43  
44

45 The sampling strategy was convenient sampling where consecutive children were enrolled till  
46 completion of sample size. A sample size of 44 subjects was needed to achieve 90% power to  
47 detect a change in slope from 0.0 under the null hypothesis to 0.45 under the alternative  
48 hypothesis when the standard deviation of the Triceps skin fold is 5.90, the standard deviation of  
49 Fat Mass by DEXA is 5.90, and the two-sided significance level is 0.05. These values were  
50 obtained from a study performed in children aged 4-10 years<sup>14</sup>. However since 2 schools were  
51  
52  
53  
54  
55  
56  
57  
58  
59  
60

1  
2  
3 included, by considering a design effect of 2, the required sample size was calculated as 88  
4  
5 subjects.  
6  
7

8  
9 Data collection was performed on a designed questionnaire for the study. It included the socio-  
10  
11 demographic data of the subject and all independent variables. Training of the principal  
12  
13 investigator (PI) and the data collector was done according to the National Health & Nutrition  
14  
15 Examination Survey (NHANES) manual<sup>15</sup>. A senior radiologist trained the data collectors for  
16  
17 identification of the anatomical surface landmarks where measurements of the skin fold were to  
18  
19 be obtained namely the angle of the scapula, the iliac crest and the midpoint of the arm for  
20  
21 measuring bicep and triceps skin folds. Intra and inter observer variability was assessed for 10  
22  
23 sets of reading and readings with a discrepancy for more than 0.4 mm were retaken and the  
24  
25 procedure revised. Abdominal and hip circumference was measured using a measuring tape  
26  
27 according to the described technique and a difference of more than one centimeter was  
28  
29 considered unacceptable.  
30  
31  
32  
33  
34  
35

36 DEXA scan was performed on Hologic Discovery-A QDR series, USA. The parameters of the  
37  
38 scan were alternating fan beam radiations of 140 kV and 100 kV with a scan width of 26.4  
39  
40 inches and scan length of maximum 77 inches (195 cm). The participant was asked to change in  
41  
42 a hospital gown and asked to lie straight on the table with hands by the side palms facing down  
43  
44 away from the thighs and look at the ceiling to maintain head position. The body was positioned  
45  
46 within the scan parameters marked on the table. The feet were rotated inwards so that the toes  
47  
48 touched each other and taped so that the position was maintained. The method of performing the  
49  
50 analysis of the estimation for %BF and total fat mass was done in the pediatric whole body scan  
51  
52 mode for children up till 12 years of age. For children aged between 12 years onwards the adult  
53  
54  
55  
56  
57  
58  
59  
60

1  
2  
3 scan mode was used for the calculation of body fat composition parameters. Reliability between  
4  
5 scans was achieved with phantom calibration.  
6  
7

8  
9 The measure of fat mass and %BF calculated by DEXA were received as a printout from the  
10  
11 scanner and values were entered in the study performa. Prediction of the same parameters via  
12  
13 preformed prediction equations (Slaughter's, Goran and Dezenberg) using skinfold thickness and  
14  
15 anthropometric measures were also made.  
16  
17

### 18 19 **Body measurements:**

20  
21  
22 All body measurements were taken in accordance with the protocol described for anthropometric  
23  
24 measurements in the National Health & Nutrition Examination Survey-3<sup>15</sup>. Body measurements  
25  
26 were taken on the right side of the body.  
27  
28

29  
30 Anthropometric measurements were taken using specially designed calipers (Holtain Calipers).  
31  
32 The measurements included weight, triceps skinfold thickness and sub scapular skinfold  
33  
34 thickness.  
35  
36

37  
38 Weight was measured using a Tanita TBF 305 body fat analyser and weighing scales (Tanita UK  
39  
40 Ltd, Yewsley, Middlesex, UK).  
41  
42

### 43 44 45 46 47 *Measuring skin fold thickness:*

48  
49  
50 **Skin fold measurements were obtained in various areas of the body such as the anterior**  
51  
52 **and posterior aspect of the upper arm corresponding to the *Bicep* and *triceps* SF.**

53  
54  
55 ***Sub scapular SF* was obtained by measuring the subcutaneous tissue beneath the shoulder**  
56  
57 **blade.**  
58  
59  
60

1  
2  
3 ***Suprailiac SF*** was obtained by measuring the fold above the pelvic bone laterally.

4  
5  
6 ***Abdominal SF*** was measured just adjacent to the umbilicus.

7  
8  
9 ***Abdominal circumference*** was measured using a measuring tape at the level of the  
10 umbilicus.

11  
12  
13 ***Hip circumference*** was measured at the maximum curvature of the hips.

14  
15  
16 Skinfolds measurements were taken to the nearest 0.1 millimeter. All skinfold measurements  
17 were done in duplicate (i.e., twice by the same investigator) since these measures have the most  
18 variability. Skinfold thickness was measured by Holtain calipers. The procedure was thoroughly  
19 explained to the children and the use of the caliper was demonstrated on the child's palm.

20  
21  
22 **The following prediction equations were used:**

23  
24  
25 ***Fat mass*** is obtained as amount of fat calculated in kilograms predicted by the DZ and G  
26 equations

27  
28  
29 **Dezenberg equation:**

30  
31  
32 **FM (kilograms) = 0.342 × body mass (kg) + 0.256 × triceps SF (mm) + 0.837 × sex (1= boy,  
33 2 = girl) - 7.388**

34  
35  
36 **Goran equation:**

37  
38  
39 **FM (kg) = 0.23 (sub scapular SF) + 0.18 (weight) + 0.13 (triceps SF) - 3.0**

40  
41  
42  
43  
44  
45  
46  
47  
48 **Percentage body fat** is obtained as a percentage of body fat predicted by the Slaughter  
49 equation.

50  
51  
52 ***For boys:***

1  
2  
3  $\%BF = 1.21$  [sum of triceps and subscapular skinfolds in mm] - 0.008 [9sum of triceps and  
4 subscapular skinfolds in mm) <sup>2</sup>] - 1.7 (coefficient for white Prepubescent boys in boys with  
5 sum of triceps and subscapular skinfolds < 35 mm);  
6  
7  
8  
9

10  
11  
12 **If sum of triceps and subscapular skinfolds > 35 mm,**  
13

14  $\%BF = 0.783$ [Sum of triceps and subscapular skinfolds mm] - 1.7 in boys;  
15  
16  
17  
18  
19

20 ***For girls:***  
21  
22  
23

24  
25  $\%BF = 1.33$  [sum of triceps and subscapular skinfolds \_mm] - 0.013 [(sum of triceps and  
26 subscapular skinfolds in mm) <sup>2</sup>] + 3.0 (coefficient for white girls) in girls with sum of triceps  
27 and subscapular skinfolds < 35 mm;  
28  
29  
30

31  
32  
33  
34 **Or if sum of triceps and subscapular skinfolds > 35 mm,**  
35  
36

37  $\%BF = 0.546$  [sum of triceps and subscapular skinfolds in mm] + 9.7 in girls  
38  
39  
40  
41

42 Data for all the independent variables was collected by the PI and assisting technician in the  
43 Dexa room. Two readings were taken for height, weight, abdominal and hip circumference,  
44 triceps, and subscapular and suprailiac skin fold thicknesses **and the average measurement for**  
45 **both the readings was taken as the final reading.** If a difference of more than 0.3 mm was  
46 recorded the readings were retaken. Calibration of the calipers was performed periodically  
47 according to the calibration block provided by the manufacturers. The stadiometer and weighing  
48 scale were also calibrated and checked for correct position of zero before each data set recording.  
49  
50  
51  
52  
53  
54  
55  
56  
57  
58  
59  
60



1  
2  
3  
4  
5  
6  
7 **Statistical analysis:** Descriptive statistics were calculated for the data with mean and standard  
8  
9 deviations for all continuous variables. Proportions were described for categorical data such as  
10  
11 gender and independent T-test was applied to assess significant difference among gender.  
12

13  
14 The next step of the analysis was to validate the equation for fat mass and percentage body fat  
15 described by Goran, Dezenberg and Slaughter. In order to do this initially correlations were  
16  
17 established between estimated FM and %BF calculated by DEXA and that predicted by using the  
18  
19 3 equations. On obtaining significant correlation of  $> 0.05$ , precision and bias was calculated.  
20  
21

22  
23 *Accuracy* was defined as the degree of closeness of predicted fat mass and percent body fat  
24  
25 obtained from the equations to their actual criterion value estimated by DEXA and would be  
26  
27 considered significant if more than 90%. This was done by obtaining the overall mean of fat  
28  
29 mass and %BF by DEXA as well as the Dezenberg, Goran and Slaughter equations **separately**.  
30  
31

32  
33 **Individual accuracies were then calculated by subtracting the predicted mean of percent**  
34  
35 **body fat and fat mass obtained from the equations from the mean value of fat mass and**  
36  
37 **percentage body fat calculated by DEXA.** The difference was then expressed as a percentage  
38  
39 of the mean of the **estimated DEXA value for the 3 equations.**  
40  
41

42  
43 *Precision* was defined as the variation between the predicted and estimated values of %BF and  
44  
45 FM within the data and was assessed as the average of the difference between FM and %BF  
46  
47 measured by DEXA and that predicted by the equations and plotting the mean of errors against 0  
48  
49 using **paired samples** t-test.  
50  
51

52  
53  
54  
55 Bland Altman plots were also generated for evaluation of **agreement and bias**. Based on the  
56  
57 above mentioned criteria the equation for %BF by Slaughter and for fat mass by Dezenberg and  
58  
59  
60

1  
2  
3 Slaughter were rendered valid or rejected. **Post hoc regression analysis was also performed**  
4 **with the line of identity against predicted versus estimated fat mass and percent body fat.** A  
5  
6 commercial Statistical Package for Social Sciences (SPSS Version 17) was used for these  
7  
8 measurements.  
9  
10

## 11 12 13 **RESULTS**

### 14 15 *Descriptive analysis and gender difference:*

16  
17  
18  
19  
20 Ninety nine (n= 99) subjects were registered with a mean age of  $14 \pm 1.89$  years (min-max 9-19  
21  
22 yrs) with 54 male and 45 female subjects. There was an evidence of overall increase in the  
23  
24 adiposity of females as compared to males. All skin fold measures as well as fat composition  
25  
26 variables were significantly higher in girls with p-value < 0.05. After assigning the binary  
27  
28 variables it was observed that there was a difference of 3.57 kg fat mass present in excess in  
29  
30 females as compared to the males as calculated by DEXA (p-value <0.0001). Significant  
31  
32 differences were also obtained for %BF which was 6.2 % more in females as compared to males  
33  
34 (p-value < 0.05). (Table 1)  
35  
36  
37  
38

39  
40 After obtaining baseline data, the equations were applied to the sample for prediction of fat mass  
41  
42 by Dezenberg and Goran as well as %BF by Slaughter. In the linear regression analysis strong  
43  
44 correlations were obtained between the predicted values and the criterion values by DEXA with  
45  
46 p-value<0.0001. (Table 2).  
47  
48  
49  
50  
51  
52  
53  
54  
55  
56  
57  
58  
59  
60

1  
2  
3  
4  
5  
6  
7 *Validation of equations:*  
8

9  
10 *Overall accuracy:*  
11

12  
13 The overall accuracy for the Slaughter equation was 98.4% which was very high and Dezenberg  
14 equation had an overall accuracy of 90.3% which was just within the cut-off designed. Goran  
15 equation showed weak overall accuracy of 83% which did not fall within the cutoff defined.  
16  
17  
18  
19

20  
21 *Variation/Precision of equations*  
22

23  
24 No significant difference was obtained between the Slaughter equation predicting %BF and that  
25 estimated by DEXA with a difference of 0.37 kg (p-value **0.425**). However, significant  
26 differences for predicting fat mass were obtained between DEXA and Dezenberg. The equation  
27 underestimated the fat mass with a bias of 1.26 kg which was statistically significant (p-value  
28 <0.0001). While Goran equation overestimated the fat mass with a bias of 1.48 kg which was  
29 statistically significant with a p-value of <0.0001  
30  
31  
32  
33  
34  
35  
36  
37  
38  
39  
40  
41

42 *Calculating Bias:*  
43

44  
45 Limits of agreement were evaluated using Bland Altman analysis. The slaughter equation  
46 revealed that more than 75% of the data was within the first standard deviation.  
47  
48  
49  
50

51  
52  
53  
54 Thus in view of the above criteria the Slaughter equation fulfilled all the criteria for predicting  
55 %BF accurately as the overall accuracy is high with minimal variation which is not statistically  
56  
57  
58  
59  
60

1  
2  
3 significant and showing good **precision** with %BF measured by DEXA. Furthermore more than  
4  
5  
6 75% of the readings were within 5% of the estimated DEXA values.  
7

8  
9 The Dezenberg and Goran equations had significant variation in prediction of fat mass which  
10  
11 was statistically significant with low level of accuracy of the Goran equation. A summary of the  
12  
13 results is shown in Table 3  
14

15  
16  
17 **Post hoc regression analysis revealed that both the Goran and Dezenberg equation did not**  
18  
19 **reveal an intercept significantly different from zero. The Slaughter equation did not reveal**  
20  
21 **an intercept significantly different from zero against estimated fat mass however the**  
22  
23 **intercept was significantly different from zero when it was assessed against estimated**  
24  
25 **percent body fat (Fig 1).**  
26  
27  
28  
29  
30  
31  
32  
33  
34  
35  
36  
37  
38  
39  
40  
41  
42  
43  
44  
45  
46  
47  
48  
49  
50  
51  
52  
53  
54  
55  
56  
57  
58  
59  
60

## DISCUSSION

The onset of obesity in the pediatric population has shown early precedence of atherosclerotic changes and diabetes mellitus with the onset of metabolic syndrome thus rendering obesity as a major health concern. Thus with this background we set out to conduct a study for the measurement of obesity in our pediatric population. A new technique of predicting body fat composition is by prediction equations (Salughter<sup>11</sup>, Goran<sup>12</sup>, and Dezenberg<sup>13</sup> equations) which have been developed for the western world. We attempted to validate these equations to predict body fat composition in our pediatric population which comprised of fat mass and %BF using DEXA as the gold standard. In this study only the Slaughter equation was validated for predicting %BF with a good correlation and high accuracy (98.4%). No significant bias was seen amongst the predicted and estimated method for measuring %BF. These equations have been validated in different studies and used widely. In a study carried out by Janz in 122 subjects of pre and post pubescent children ranging from 8-17 years very high intra class correlations (0.98-0.99) and high validity correlations of (0.79-0.99) were achieved<sup>16</sup>. In another study conducted in Zaragoza, Spain carried out on 237 adolescents it was found that the Slaughter equations had the narrowest limits of agreement as compared to the other equations and did not show statistically significant bias<sup>17</sup>. Our results have been similar with the equation showing validity across all criteria.

1  
2  
3 In the study by Goran et al, after failing to validate the Slaughter equation they derived an  
4 equation for their own sample. It was reported that all skin folds showed higher  
5 correlations with fat mass rather than percent body fat so equation for the prediction of fat  
6 mass was generated. Another method of calculating fat composition was also deployed in  
7 this study using bioelectrical impedance analysis. They found the variables of triceps, sub  
8 scapular and weight significantly correlating. The equation was further cross validated on  
9 1/3<sup>rd</sup> of the sample according to the criteria of Lohman which consisted of assessing the  
10 difference between the predicted and estimated fat mass as well as minimal increase of the  
11 SEE. Only the R<sup>2</sup> was reported of 0.88.  
12  
13  
14  
15  
16  
17  
18  
19  
20  
21  
22  
23  
24  
25  
26  
27  
28

29 This equation was then further cross validated in the study by Dezenberg. In his study  
30 after initially failing to validate the Goran and Slaughter equation, a prediction equation  
31 was formulated across a sample of different ethnic cohorts consisting of both black and  
32 white population. The predictors considered significant were weight; triceps skin fold,  
33 gender, ethnicity and abdominal skin fold. However since we were not evaluating ethnicity,  
34 the equation adopted in this study consisted only of weight, triceps skin fold and gender  
35 predictors. A significant point of concern in this study was the fact that regression analysis  
36 was performed between percentage body fat as predicted by Slaughter against fat mass as  
37 predicted by dexa. Since both variables were in different units the inability to validate the  
38 equations appeared inevitable. In our study adopting the approach of Dezenberg et al we  
39 achieved good correlation with the intercept not significantly different from zero with  
40 Slaughter equations predicting percent body fat and fat mass in kilograms estimated by  
41 dexa (fig 2d) however the regression analysis between predicted percent body fat and that  
42  
43  
44  
45  
46  
47  
48  
49  
50  
51  
52  
53  
54  
55  
56  
57  
58  
59  
60

1  
2  
3 estimated with dexa shows an intercept significantly different from zero. Despite this as  
4  
5 multiple validation criteria were applied and the Slaughter equation maintained robustness  
6  
7  
8 across all of them it can be used with some considerations of maturity specificity and  
9  
10  
11 ethnicity in our population.

12  
13  
14 Our results were similar to the results by Eisenmann who evaluated a number of equations  
15  
16 along with bioelectrical impedance analysis. In his study he found that the Slaughter  
17  
18 equations consisting of triceps and subscapular skinfold were showing better limits of  
19  
20 agreement and reduced bias there only one of the slaughter equations was adopted.  
21  
22 Significant differences were assessed between the methods for evaluating body fat  
23  
24 composition by DEXA and SF equations, bioelectrical impedance.  
25  
26

27  
28 A few issues are worthy of mention here. These results could be explained by the  
29  
30 application of coefficients that were derived for the western population. Therefore  
31  
32 determining coefficients for the predictors used in the Dezenberg equation and deriving a  
33  
34 prediction equation that is sample specific could possibly yield better results.  
35  
36  
37  
38  
39  
40  
41

42 Another reason for inability to validate the DZ equation might be that our sample  
43  
44 consisted of both pre and post pubescent children. The application of maturity specific  
45  
46 coefficients by performing the Tanner staging might have different results as these were  
47  
48 conducted on children who were prepubescent. Furthermore data regarding the ethnic  
49  
50 origin and socio demographic status was also not applied. However all children were living  
51  
52 in the same town going to community center schools with a middle class status.  
53  
54  
55  
56  
57  
58  
59  
60

1  
2  
3 **The Goran equation also was established on a cohort of children whose mean age was**  
4 **much lower than that of our sample. Furthermore gender was not accounted for in the**  
5 **equation we used whereas in our population significant differences were found between**  
6 **boys and girls for fat mass as well as all skin folds.**  
7  
8  
9  
10  
11  
12  
13  
14  
15  
16

17 Very few studies have been done regionally in the South Asian population. In a study conducted  
18 in Sri Lanka in 282 children ages ranging from 5-15 years were tested for predicted %BF using  
19 multiple equations as well as Slaughter equation<sup>18</sup>. Although the bias calculated (-11.6 to 5.8)  
20 was not significant but the limits of agreement were high with significant underestimation of  
21 %BF rendering the equation invalid. An explanation for these results could be the criterion  
22 method that was used which was **isotope dilution**. No results have been stated for validation  
23 against DEXA. In our study bias was not significant and more than 75% of the sample lied  
24 between a 5% variation as compared to DEXA. In 2010 a study was conducted in Hong Kong  
25 where children aged 9-19 were recruited and skin fold thickness were validated with subsequent  
26 formation of new equations<sup>19</sup>. However again the criterion used was air displacement  
27 plethysmography with only a subset validation with DEXA. They found significant difference  
28 between %BF estimated by the Slaughter equation although the absolute value was only of  
29 1.52%. This was negated by our study which could be explained by the criterion method as being  
30 different and a significant difference in ethnicity. To the best of our understanding this is the  
31 first study conducted in Pakistani pediatric population to determine the correlation and validation  
32 of skinfold thickness equations for estimation of body fat composition using DEXA as gold  
33 standard.  
34  
35  
36  
37  
38  
39  
40  
41  
42  
43  
44  
45  
46  
47  
48  
49  
50  
51  
52  
53  
54  
55  
56  
57  
58  
59  
60



**LIMITATIONS:**

Due to the addition of 2 schools the effect of institution was added as a result of which the formation and validation of fat mass equation for our population could not be assessed as the control group and validation group had significant differences between them.

As the age range was wide, different levels of maturity needed to be assessed by the Tanner staging.

Data for ethnic origin and socio-demographics was not held in consideration.

Furthermore the cut-off for accuracy to be deemed significant was 90% which was an arbitrary figure and not used previously. However the Slaughter equation revealed a figure of 98.4% which is very high.

In post hoc analysis regression analysis was performed for checking the line of identity in measured versus predicted fat mass and percent body fat. Although the Dezenberg and Goran equations revealed higher correlations with intercept not statistically different from 0 they were showing significant differences in fat mass prediction. While the Slaughter equation was showing an intercept different from 0 it was fulfilling all other criteria and we believe that if studies with larger sample size and accounting for ethnicity and maturity specific coefficients are performed it will stand its robustness.

## CONCLUSIONS

**We conclude that the Slaughter equation for estimating %BF showed reasonably strong validation with DEXA. However for interchangeable use with DEXA further studies with larger sample sizes and maturity considerations need to be conducted.**

However, for estimation of fat mass, the previously formulated equations by Goran and Dezenberg revealed significant difference in our population. We do recommend further cross-validation studies for developing and validation of skin fold equation specific to Pakistani pediatric population.

## ACKNOWLEDGMENT

We would like to acknowledge the department of community health sciences for their support in carrying out the logistics of the study. The authors would also acknowledge the efforts of Dr. Nadeem Ahmad ex chairperson for his support in the project.

## CONFLICT OF INTEREST:

1  
2  
3 This study was funded by the university research council of Aga Khan University hospital and  
4  
5 was part of the thesis requirement for Master's program  
6  
7  
8  
9  
10  
11  
12  
13  
14  
15  
16  
17  
18

## 19 REFERENCES

- 20  
21 1. Puska P, Nishida C. Obesity and overweight. World health organization; global strategy  
22 on diet, physical activity and health. 2003  
23  
24  
25  
26
- 27 2. Young-Hyman D, Schlundt DG, Herman L, et al. Evaluation of the insulin resistance  
28 syndrome in 5- to 10-year-old overweight/obese African-American children. Diabetes  
29 Care 2001;**24**:1359–64.  
30  
31  
32  
33
- 34 3. Yusuf S, Hawken S, Ounpuu S, et al. Effect of potentially modifiable risk factors  
35 associated with myocardial infarction in 52 countries (the INTERHEART study): case-  
36 control study. Lancet 2004;**364**:937-52.  
37  
38  
39  
40  
41  
42
- 43 4. Strauss R, Pollack H. Epidemic increase in childhood overweight, 1986-1998.  
44 JAMA 2001;**286**:2845-48.  
45  
46  
47
- 48 5. Cole T, Bellizzi M, Flegal K, et al. Establishing a standard definition for child overweight  
49 and obesity worldwide: international survey. BMJ 2000;**320**:1240  
50  
51  
52  
53
- 54 6. Wang ZM, Pierson Jr RN, Heymsfield SB. The five-level model: a new approach to  
55 organizing body-composition research. Am Soc Nutrition 1992. p. 19-28.  
56  
57  
58  
59  
60

- 1  
2  
3  
4  
5  
6  
7  
8  
9  
10  
11  
12  
13  
14  
15  
16  
17  
18  
19  
20  
21  
22  
23  
24  
25  
26  
27  
28  
29  
30  
31  
32  
33  
34  
35  
36  
37  
38  
39  
40  
41  
42  
43  
44  
45  
46  
47  
48  
49  
50  
51  
52  
53  
54  
55  
56  
57  
58  
59  
60
7. Johansson AG, Forslund A, Sjödin A, et al. Determination of body composition - a comparison of dual-energy x-ray absorptiometry and hydrodensitometry. *Am J Clin Nutr* 1993;**57**:323–26.
8. Pintauro S, Nagy TR, Duthie C, et al. Cross-calibration of fat and lean measurements by dual energy x-ray absorptiometry to pig carcass analysis in the pediatric body weight range. *Am J Clin Nutr* 1996;**63**: 293–99.
9. Wang ZM, Pierson Jr RN, Heymsfield SB. The five-level model: a new approach to organizing body-composition research. *Am Soc Nutrition*; 1992. p. 19-28
10. Ellis J, Shypailo R, Pratt J, Pond W. Accuracy of dual energy x-ray absorptiometry in children for body composition measurements. *Am J Clin Nutr* 1994;**60**:660-65.
11. Slaughter MH, Lohman TG, Boileau RA, et al. Skinfold equations for estimation of body fatness in children and youth. *Human Biology* 1988;**60**:709–23.
12. Goran M, Driscoll P, Johnson R, et al. Cross-calibration of body-composition techniques against dual-energy X-ray absorptiometry in young children. *Am J Clin Nutr* 1996;**63**:299-305.
13. Dezenberg CV, Nagy TR, Gower BA, et al. Predicting body composition from anthropometry in preadolescent children. *Int J Obes* 1999;**23**:253–59.
14. Eisenmann J, Heelan K, Welk G. Assessing body composition among 3- to 8-year-old children: anthropometry, BIA, and DXA. *Obesity Research* 2004;**12**:1633–40.
15. National health and nutrition examination survey III. Body Measurements (Anthropometry). Westat, Inc. 1650 Research Boulevard. Rockville, MD 20850 ...  
[www.cdc.gov/nchs/data/nhanes/nhanes3/cdrom/.../ANTHRO.PDF](http://www.cdc.gov/nchs/data/nhanes/nhanes3/cdrom/.../ANTHRO.PDF)

- 1  
2  
3  
4 16. Janz KF, Nielsen DH, Cassady SL, et al. Cross-validation of the Slaughter skinfold  
5 equations for children and adolescents. *Medicine & Science in Sports & Exercise*  
6 1993;**25**:1070.  
7  
8  
9  
10  
11 17. Rodriguez G, Moreno LA, Blay MG, et al. Body fat measurement in adolescents:  
12 comparison of skinfold thickness equations with dual-energy X-ray absorptiometry. *Eur J*  
13 *Clin Nut* 2005;**59**:1158-66.  
14  
15  
16  
17 18. Wickramasinghe VP, Lamabadusuriay SP, Cleghorn GJ, et al. Use of skin-fold thickness  
18 in Sri Lankan children: Comparison of several prediction equations. *Indian Journal of*  
19 *Pediatrics* 2008;**75**:1237-42.  
20  
21  
22  
23  
24  
25 19. Midorikawa T, Ohta M, Hikiyama Y, et al. Predicting total fat mass from skinfold  
26 thicknesses in Japanese prepubertal children: a cross-sectional and longitudinal  
27 validation. *Asia Pac J Clin Nutr* 2011;**20**:426-31.  
28  
29  
30  
31  
32  
33  
34  
35  
36  
37  
38  
39  
40  
41  
42  
43  
44  
45  
46  
47  
48  
49  
50  
51  
52  
53  
54  
55  
56  
57  
58  
59  
60

**Table 1:** Baseline Demographic and measured values of studied subjects

| Total subjects: 99        |             |              |
|---------------------------|-------------|--------------|
|                           | Males = 54  | Females = 45 |
|                           | mean (SD)   | mean (SD)    |
| Age (yrs)                 | 13.8 (2.0)  | 14.13(2.2)   |
| Weight (kg)*              | 41.7 (12.5) | 43.6 (8.2)   |
| BMI (kg/m <sup>2</sup> )* | 17.7 (3.5)  | 19.0 (3.4)   |
| SC-SF (mm)*               | 9.9 (6.1)   | 14.1 (5.4)   |
| T-SF (mm)*                | 11.4 (7.1)  | 16.0 (6.1)   |
| FM by DZ-Eq               | 8.9 (5.4)   | 12.7 (4.1)   |
| FM by G-Eq                | 20.7 (4.1)  | 28.6 (3.2)   |
| %BF BY SL-Eq              | 10.7 (9.3)  | 13.3 (5.1)   |
| DEXA FM*                  | 8.3 (5.6)   | 10.2 (3.2)   |
| DEXA %BF*                 | 19.1 (7.6)  | 29.6 (5.1)   |

\*: p value <0.05

BMI: Body Mass Index

SC-SF: Subscapular skinfold

T-SF: Tricep Skin Fold

FM: Fat Mass

%BF: Percentage Body Fat

DZ-Eq: Dezenberg Equation

G-Eq: Goran Equation

SL-Eq: Slaughter Equation

**Table 2:** Correlation coefficients calculated for prediction equations of DZ, G and SL for fat mass (FM) and percentage body fat (%BF). All equations showed good correlations with estimated fat mass and percentage body fat using DEXA showing significant p-values of <0.0001.

| Equations | R <sup>2</sup> | SEE  |
|-----------|----------------|------|
| • DZ-FM   | 0.8            | 2.45 |
| • G-FM    | 0.86           | 2.06 |
| • SL-% BF | 0.76           | 3.73 |

SEE: Standard Error of Estimate

DZ-FM: Dezenberg Fat Mass

G-FM: Goran Fat Mass

SL %BF: Slaughter Percentage Body Fat

Table 3: Validation criteria for prediction of % body fat and fat mass

|             | <b>Slaughter</b> | <b>Goran</b>        | <b>Dezenberg</b>   |
|-------------|------------------|---------------------|--------------------|
| Correlation | 0.76             | 0.8                 | 0.86               |
| Accuracy    | 98.4             | 90.3                | 83.7               |
| Precision   | 0.37<br>(p =0.4) | -1.26<br>(p<0.0001) | 1.48<br>(p<0.0001) |

According to all 3 criteria the Slaughter equation showed consistency good correlation, very high accuracy and good precision using paired t-test.



## LEGENDS

**Figure 1:** (1a) Bland Altman plot shows uniform distribution between %BF calculated by DEXA and Slaughter. Although limits of agreement wide more than 75% of sample is between 5% variation; (1b) shows significant overestimation of fat mass between DEXA and Goran equation with almost the entire sample above the zero levels; (1c) shows significant underestimation of fat mass with more than 60% of the sample lying below the 0 level in the Dezenberg equation.

**Figure 2:** (2a,b) regression analysis with line of identity shows the intercept at an angle of 45 degrees not significantly different from zero in both the Dezenberg and Goran equations. Fig 2c reveals the regression analysis with line of identity between Slaughter %BF and estimated %BF DEXA with intercept significantly different from zero. Fig 2d reveals intercept not significantly different from zero between the SL equation for %BF and FM estimated by DEXA.

1  
2  
3  
4  
5  
6  
7  
8  
9  
10  
11  
12  
13  
14  
15  
16  
17  
18  
19  
20  
21  
22  
23  
24  
25  
26  
27  
28  
29  
30  
31  
32  
33  
34  
35  
36  
37  
38  
39  
40  
41  
42  
43  
44  
45  
46  
47  
48  
49  
50  
51  
52  
53  
54  
55  
56  
57  
58  
59  
60

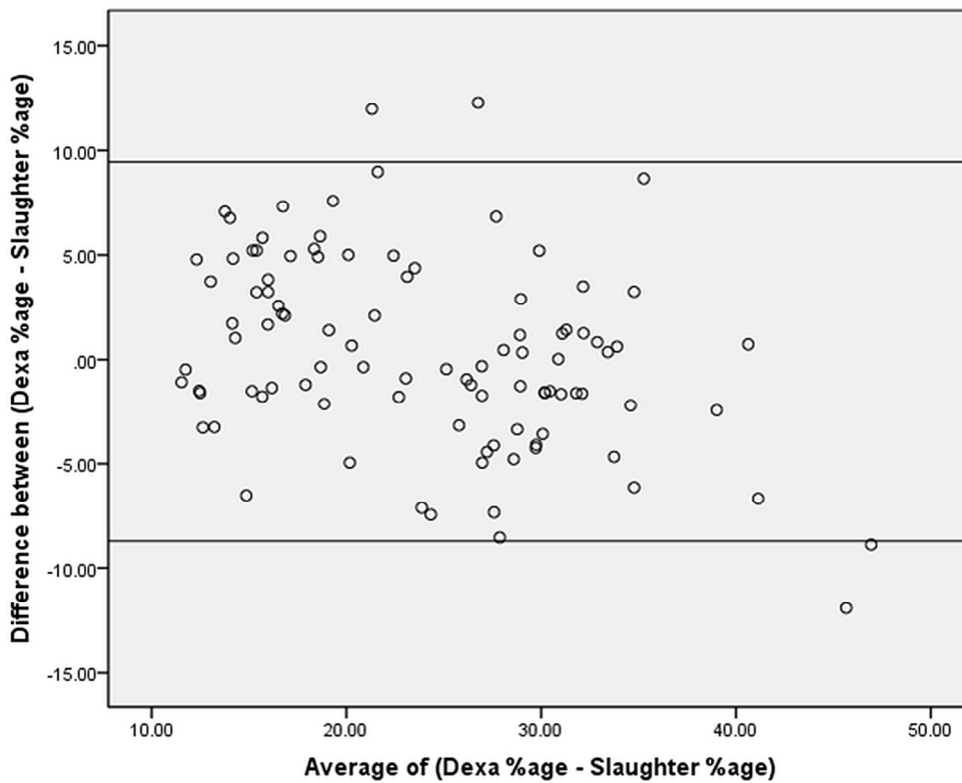

90x71mm (300 x 300 DPI)

ew only

1  
2  
3  
4  
5  
6  
7  
8  
9  
10  
11  
12  
13  
14  
15  
16  
17  
18  
19  
20  
21  
22  
23  
24  
25  
26  
27  
28  
29  
30  
31  
32  
33  
34  
35  
36  
37  
38  
39  
40  
41  
42  
43  
44  
45  
46  
47  
48  
49  
50  
51  
52  
53  
54  
55  
56  
57  
58  
59  
60

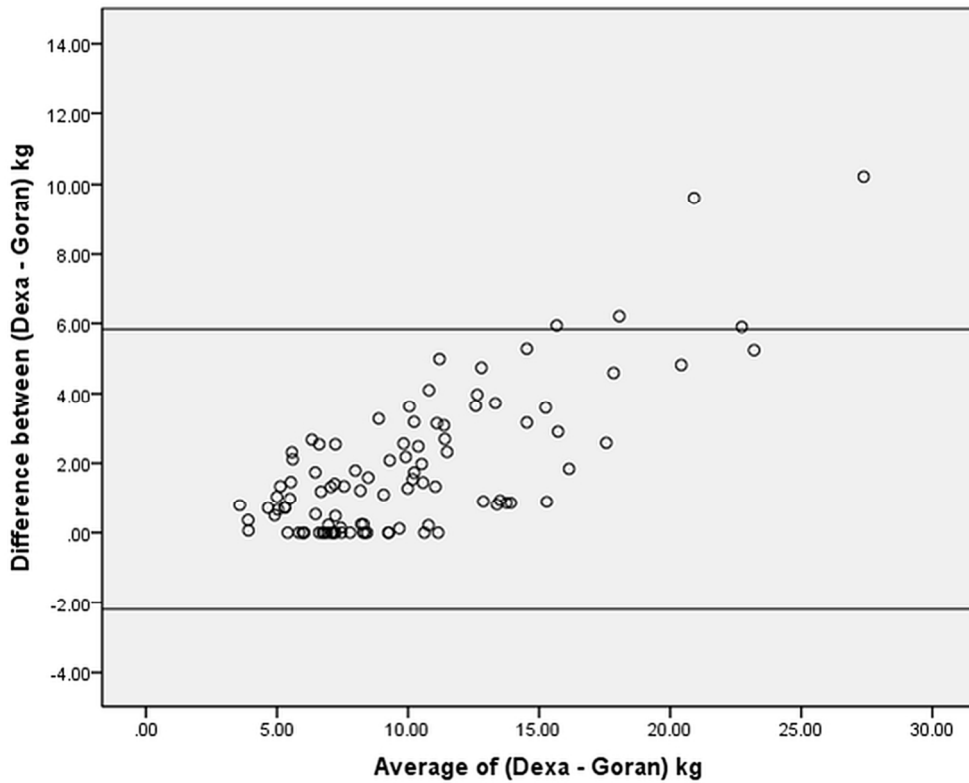

90x71mm (300 x 300 DPI)

1  
2  
3  
4  
5  
6  
7  
8  
9  
10  
11  
12  
13  
14  
15  
16  
17  
18  
19  
20  
21  
22  
23  
24  
25  
26  
27  
28  
29  
30  
31  
32  
33  
34  
35  
36  
37  
38  
39  
40  
41  
42  
43  
44  
45  
46  
47  
48  
49  
50  
51  
52  
53  
54  
55  
56  
57  
58  
59  
60

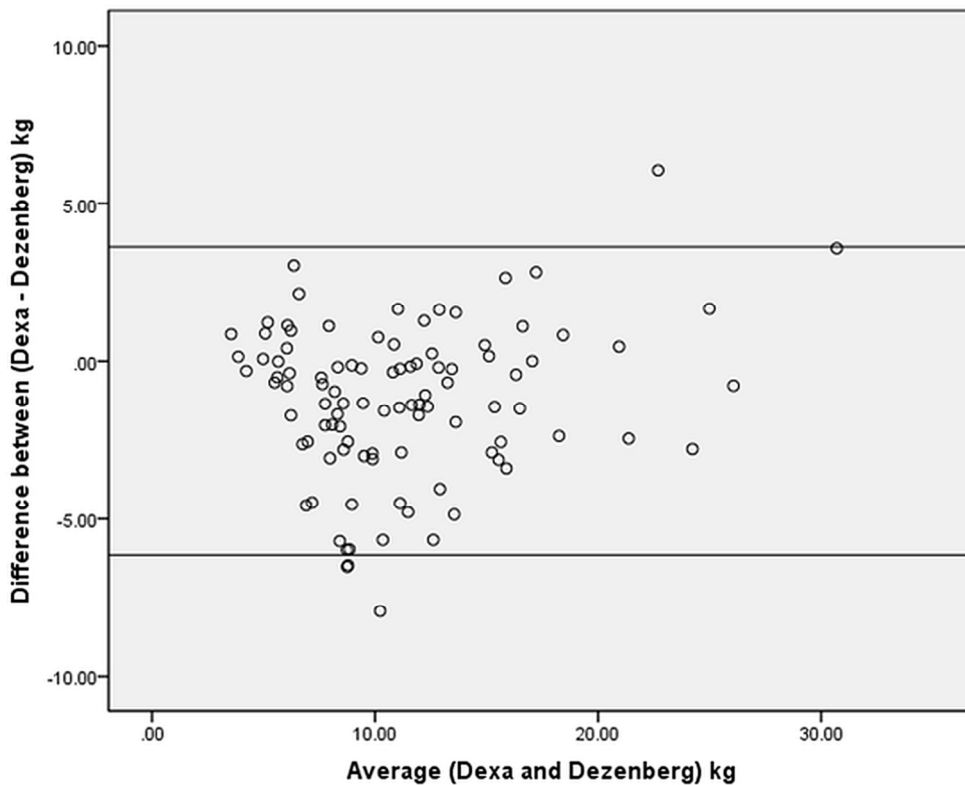

90x72mm (300 x 300 DPI)

ew only

1  
2  
3  
4  
5  
6  
7  
8  
9  
10  
11  
12  
13  
14  
15  
16  
17  
18  
19  
20  
21  
22  
23  
24  
25  
26  
27  
28  
29  
30  
31  
32  
33  
34  
35  
36  
37  
38  
39  
40  
41  
42  
43  
44  
45  
46  
47  
48  
49  
50  
51  
52  
53  
54  
55  
56  
57  
58  
59  
60

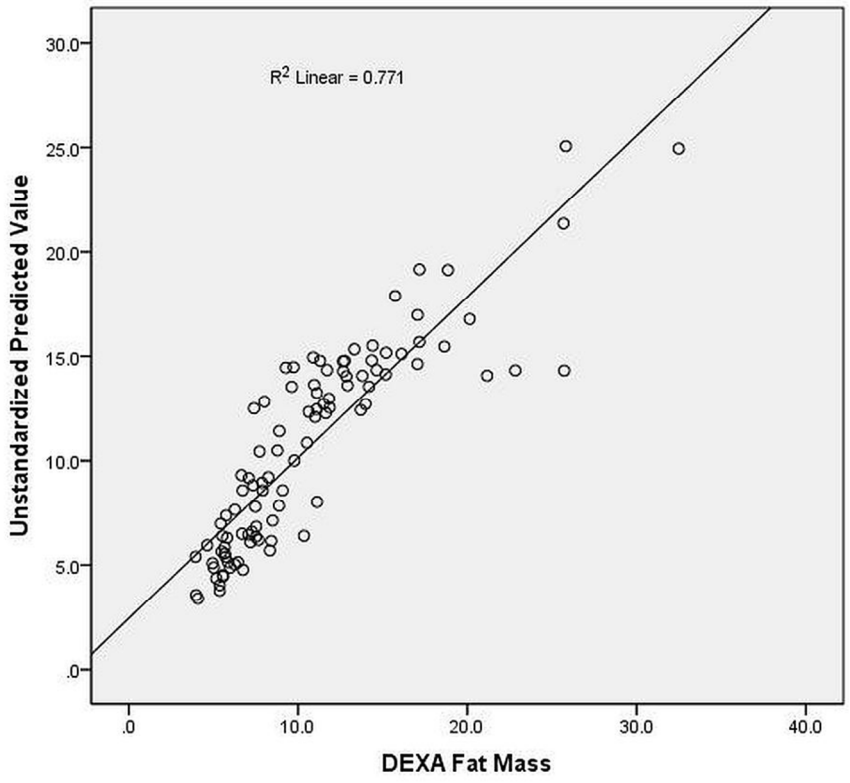

90x72mm (300 x 300 DPI)

ew only
